# Supplementary material
Source: PubMed Central journal article supplement (PMC3302335)
Supplement: supp_86.6.3050_FigS1.pdf [file supp_86.6.3050_FigS1.pdf]

# Hepatitis C virus genotype 1b covariance network

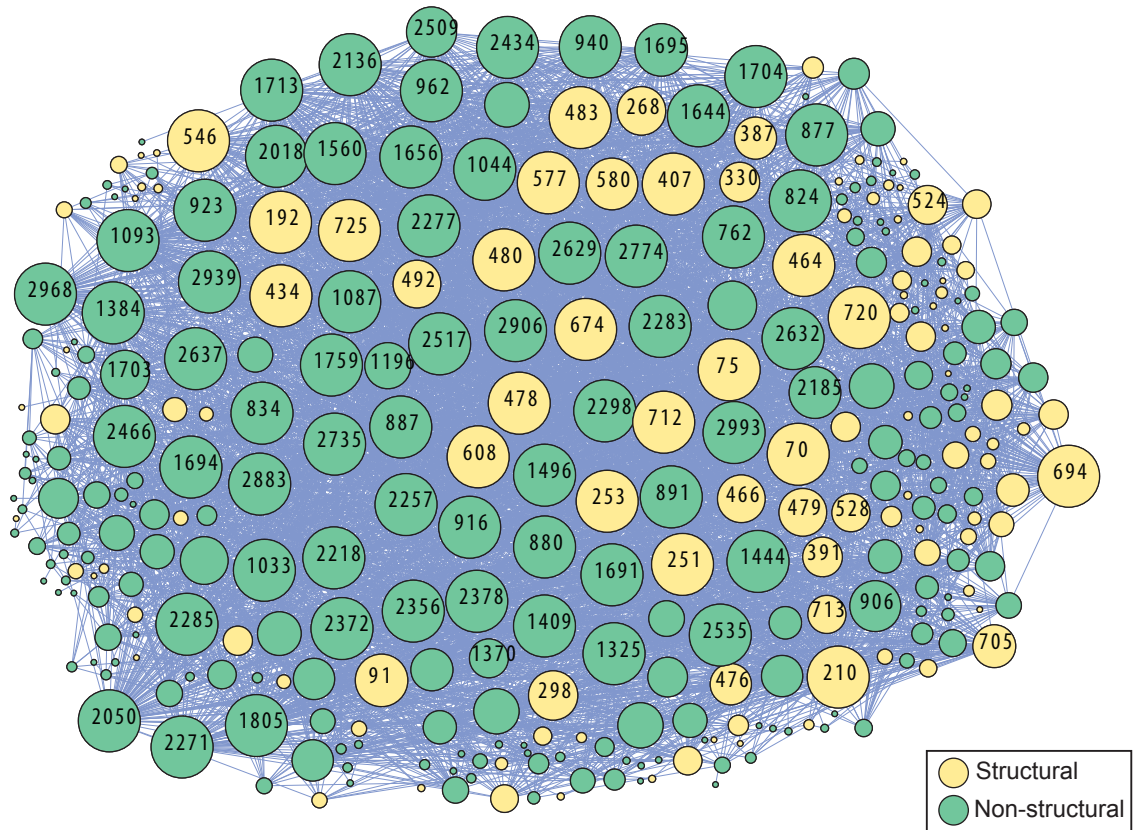

Distribution of nodes by degree of connectivity

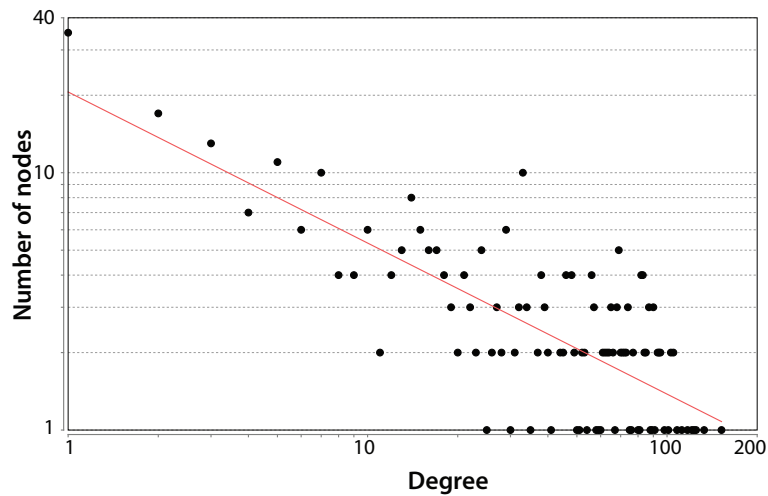

Supp. Fig 1a: Network view of HCV 1b covariance network generated from 300 full-length polyprotein sequences. The distribution of nodes by degree of connectivity is shown in the bottom panel.

# Hepatitis C virus genotype 1a covariance network (100 sequences)

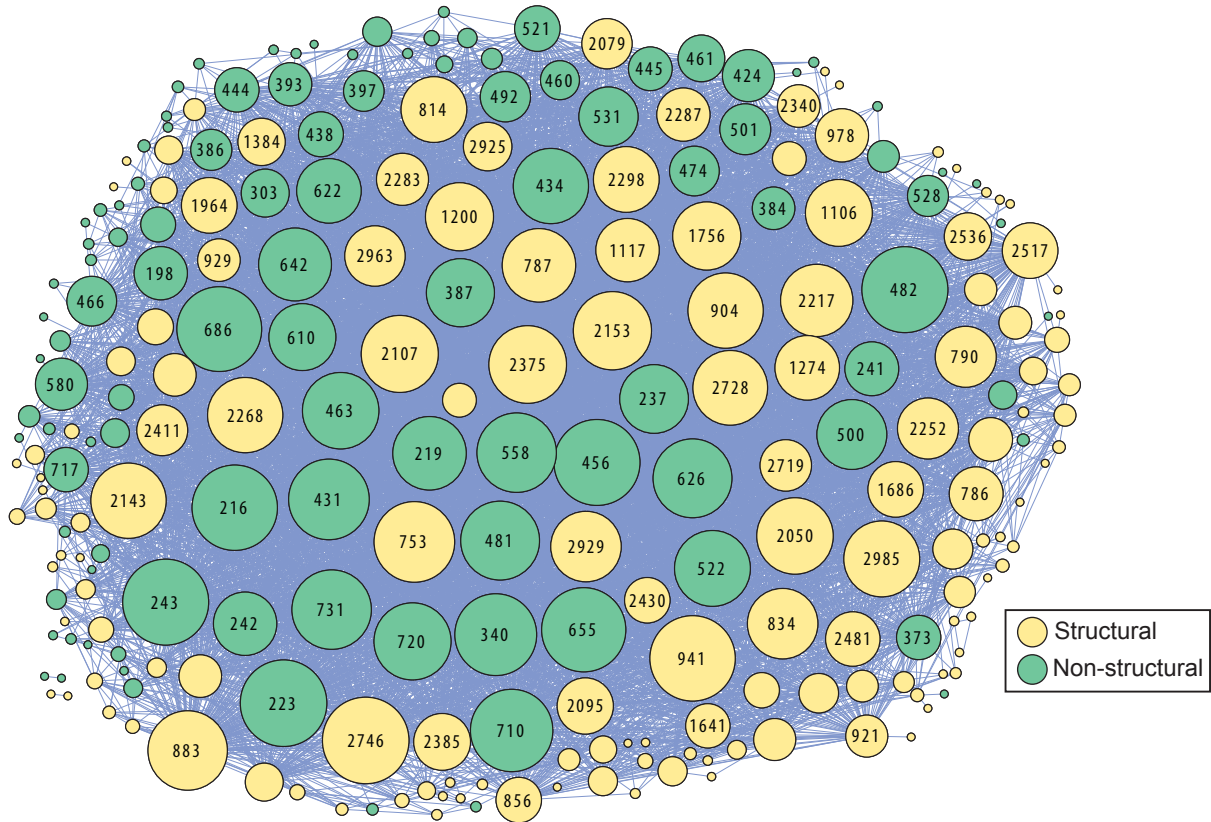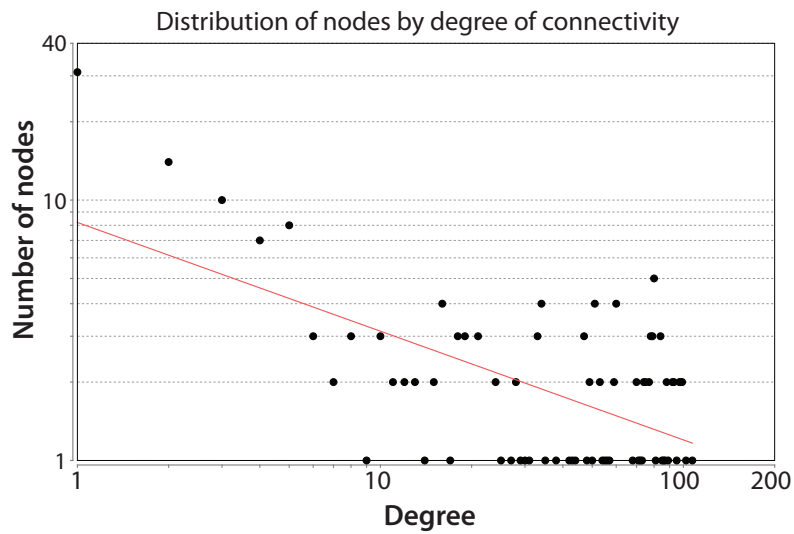

**Supp. Fig 1b:** Network view of HCV 1a covariance network generated from 100 full-length polyprotein sequences. The distribution of nodes by degree of connectivity is shown in the bottom panel.

# Hepatitis C virus genotype 1a covariance network (47 sequences)

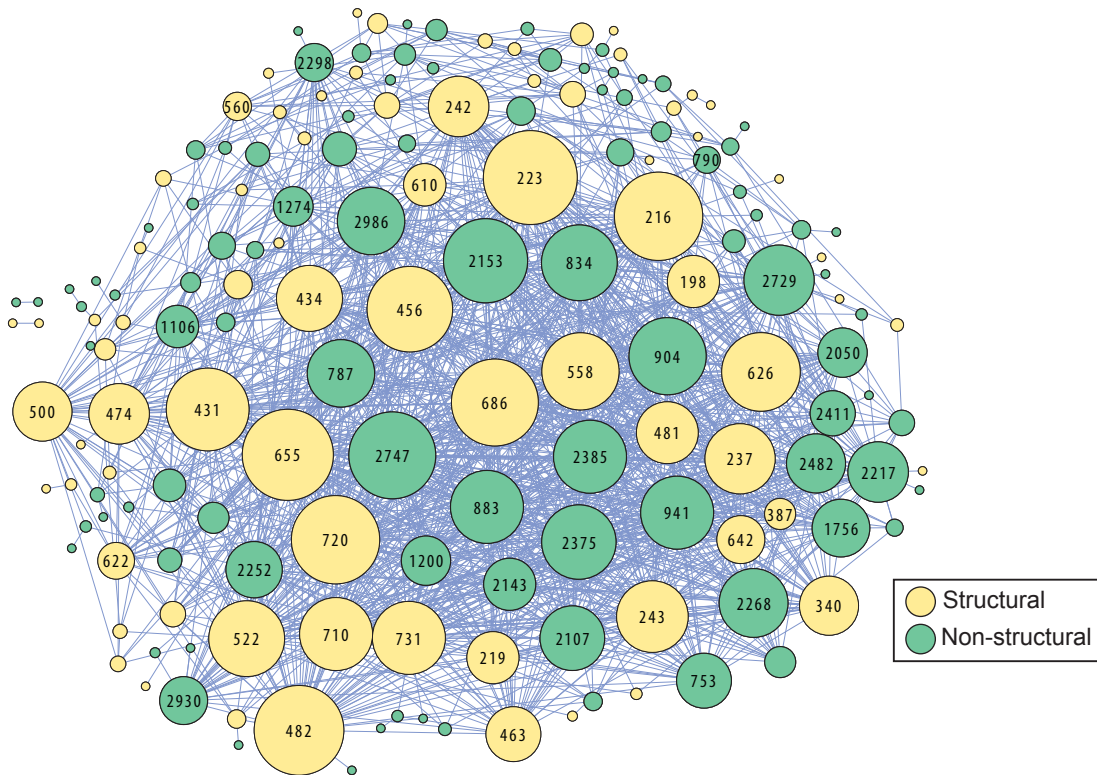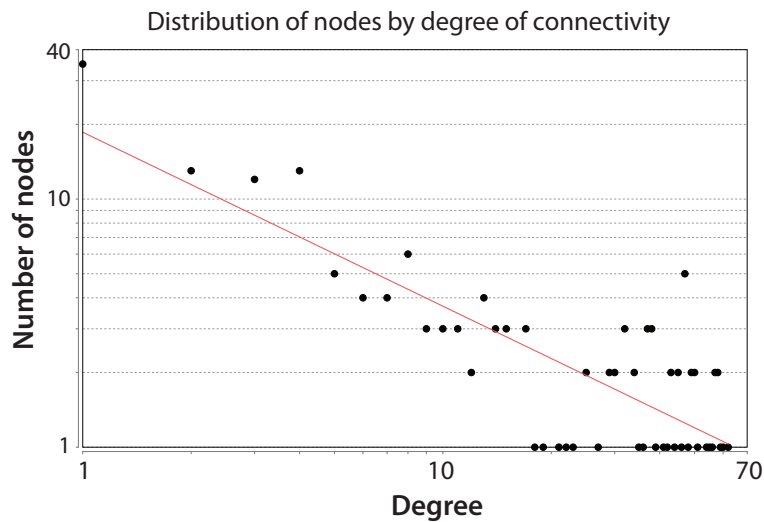

**Supp. Fig 1c:** Network view of HCV 1a covariance network generated from 47 full-length polyprotein sequences. The distribution of nodes by degree of connectivity is shown in the bottom panel.

### Hepatitis C virus genotype 1a covariance network (32 sequences)

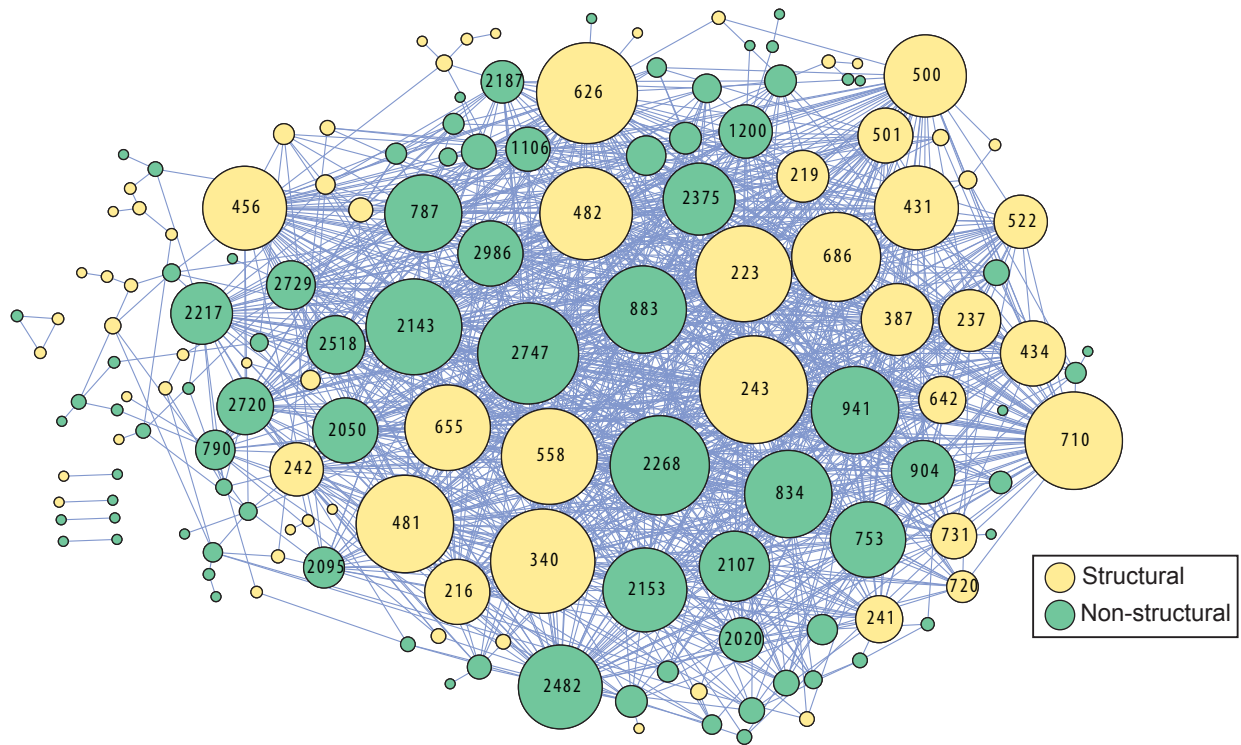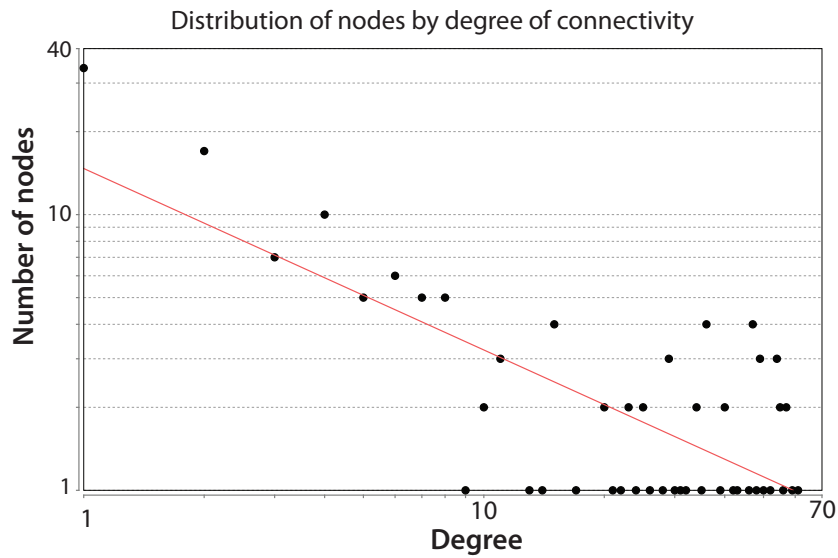

Supp. Fig 1d: Network view of HCV 1a covariance network generated from 32 full-length polyprotein sequences. The distribution of nodes by degree of connectivity is shown in the bottom panel.



# Hepatitis C virus genotype 1a covariance network (16 sequences)

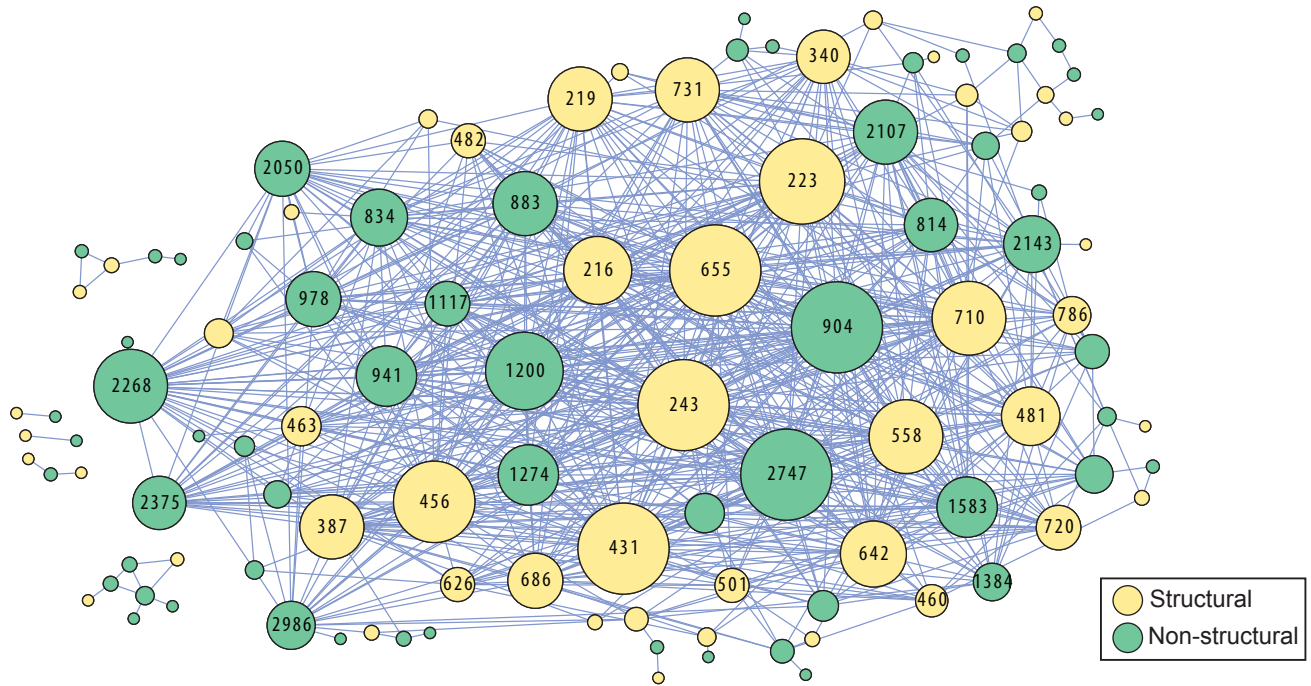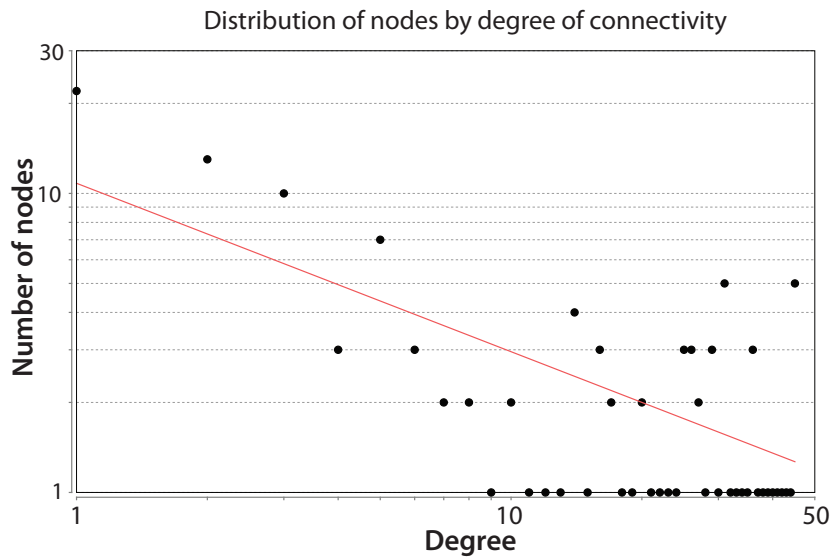

**Supp. Fig 1e:** Network view of HCV 1a covariance network generated from 16 full-length polyprotein sequences. The distribution of nodes by degree of connectivity is shown in the bottom panel.

# GBV-C virus covariance network

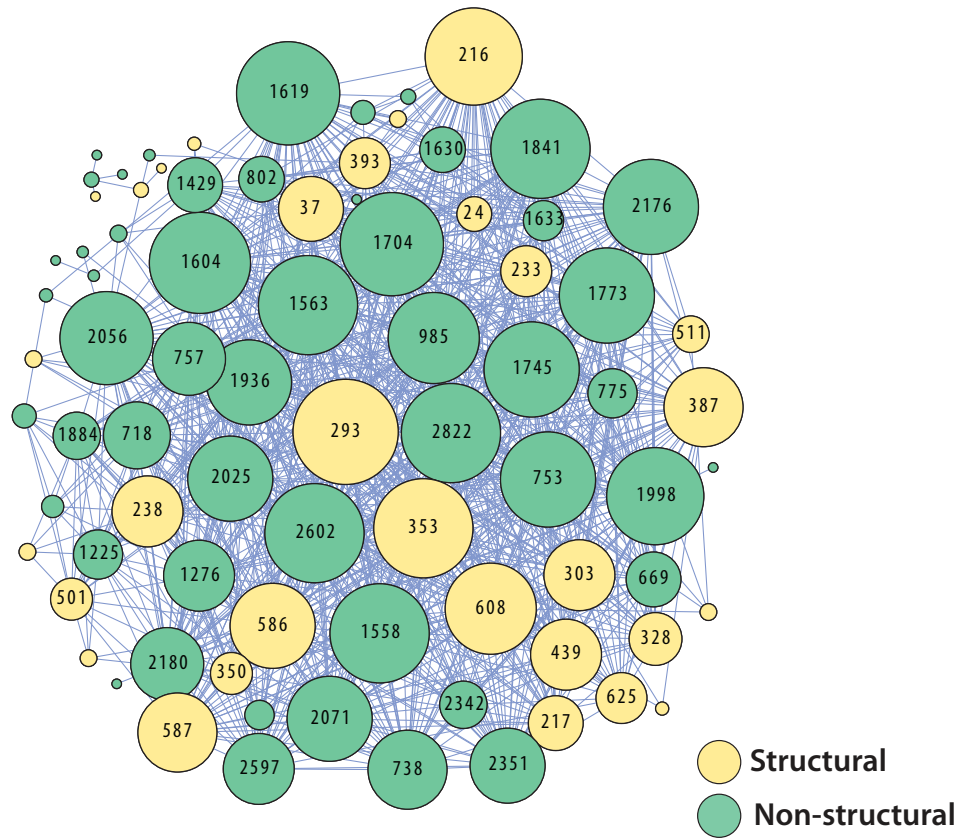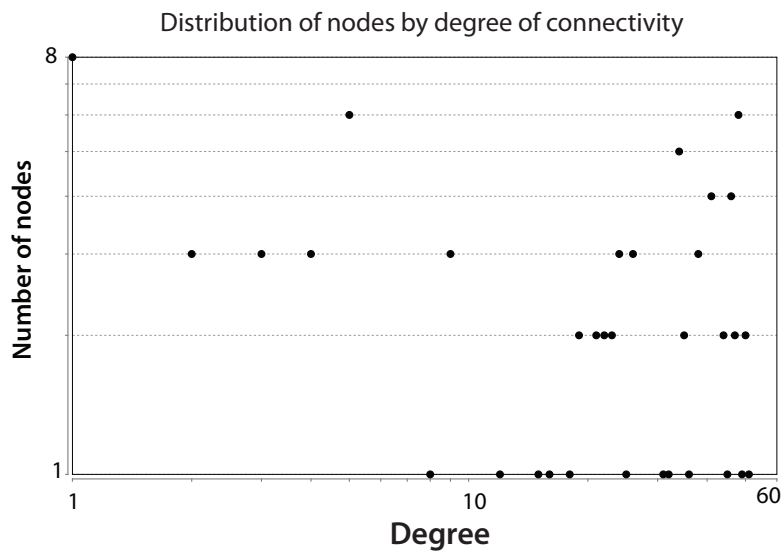

**Supp. Fig 1f:** Network view of GBV-C covariance network generated from 40 full-length polyprotein sequences. The distribution of nodes by degree of connectivity is shown in the bottom panel.

## Dengue virus 2 covariance network

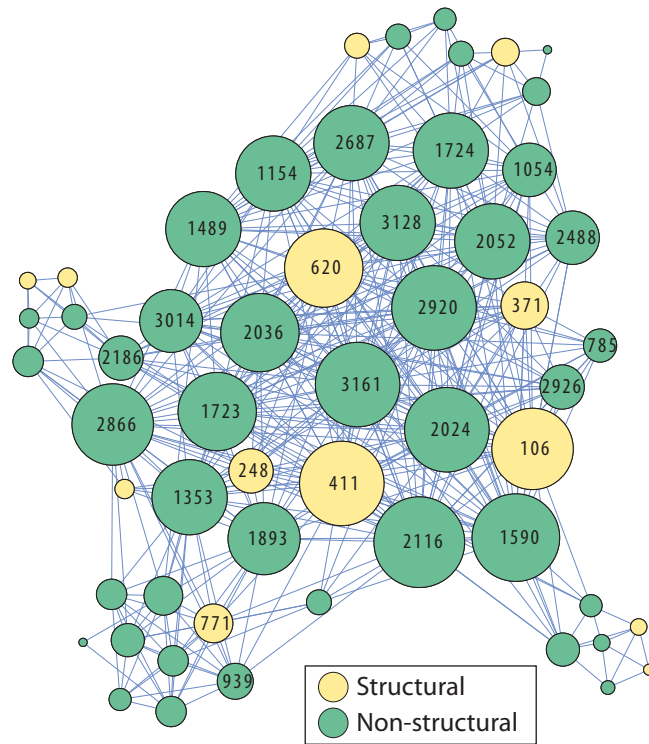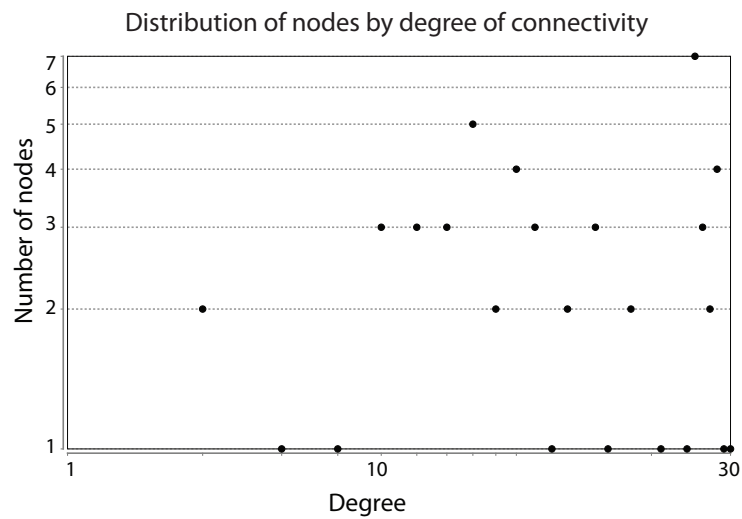

**Supp. Fig 1g:** Network view of DV-2 covariance network generated from 100 full-length polyprotein sequences. The distribution of nodes by degree of connectivity is shown in the bottom panel.

## West Nile virus covariance network

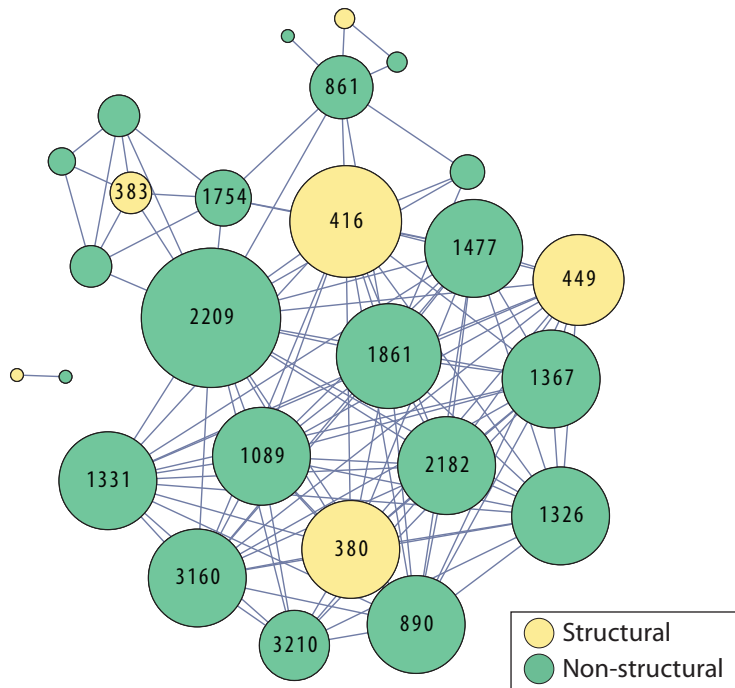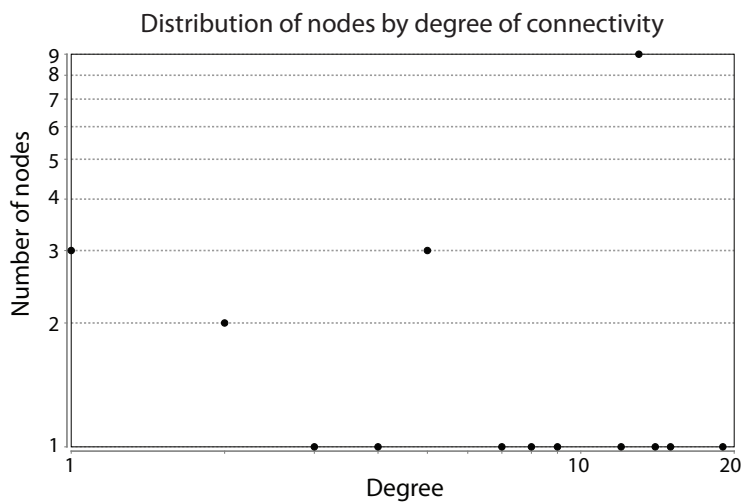

**Supp. Fig 1h:** Network view of WNV covariance network generated from 64 full-length poly-protein sequences. The distribution of nodes by degree of connectivity is shown in the bottom panel.



## Hepatitis A virus covariance network

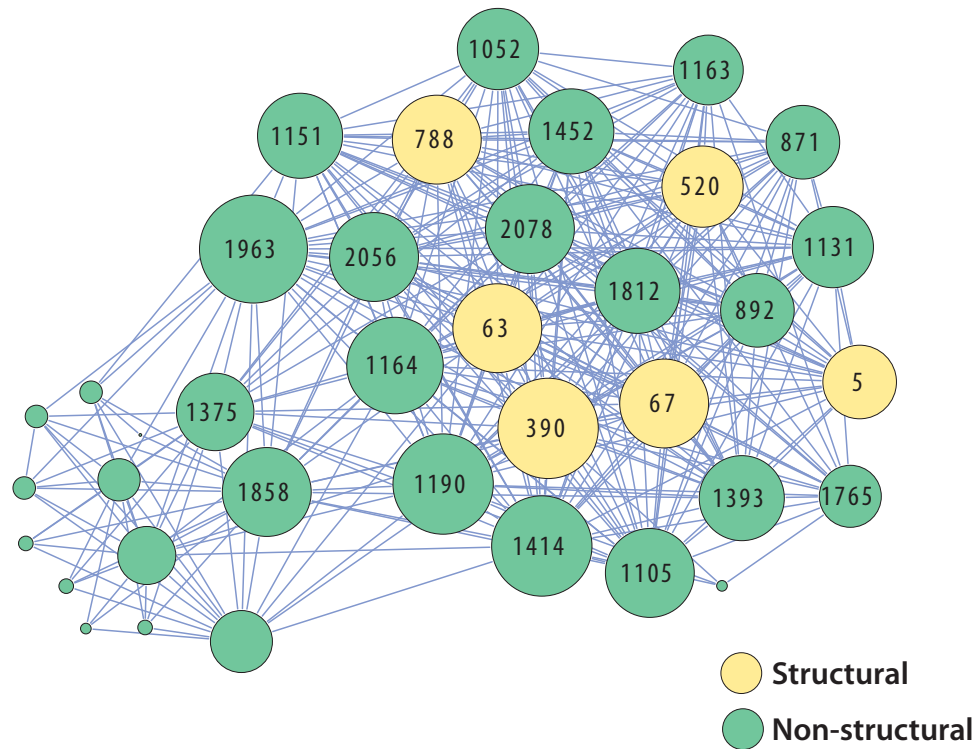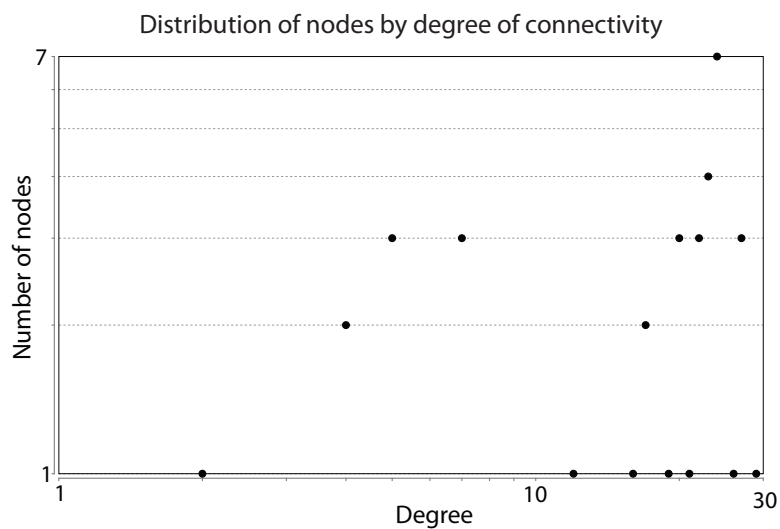

**Supp. Fig 1i:** Network view of Hepatitis A virus covariance network generated from 33 full-length polyprotein sequences. The distribution of nodes by degree of connectivity is shown in the bottom panel.

## Polio virus type 1 covariance network

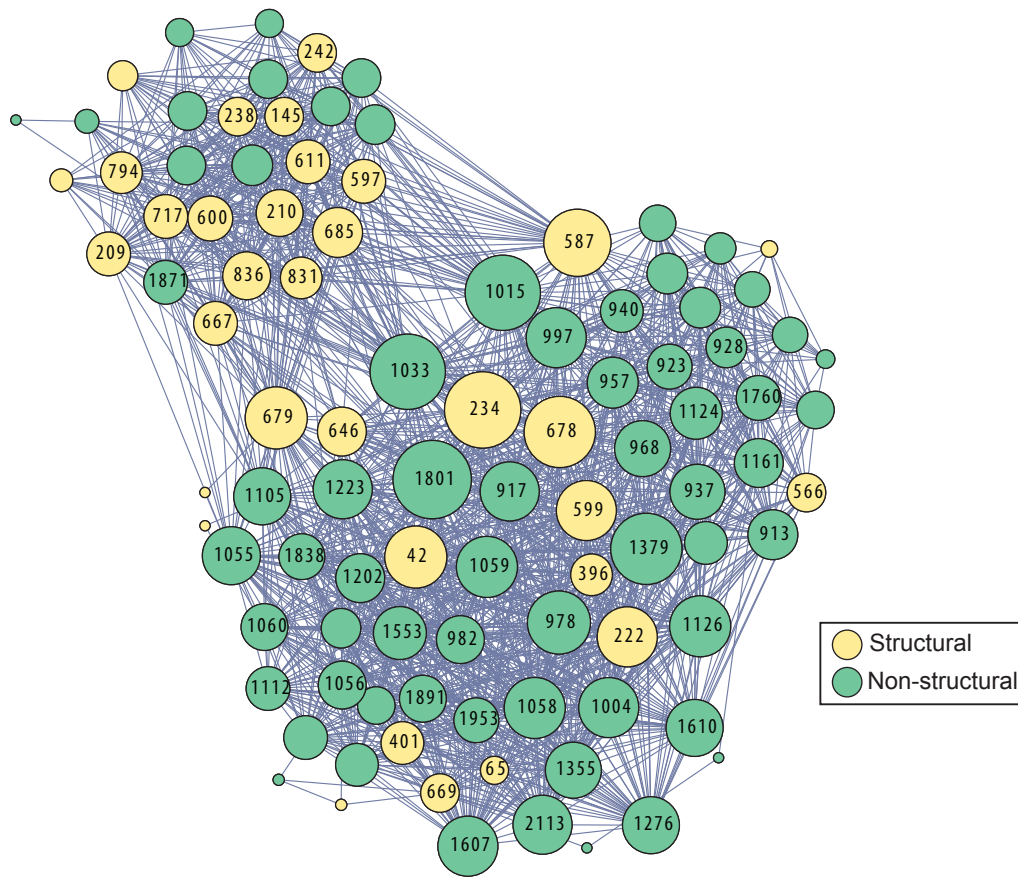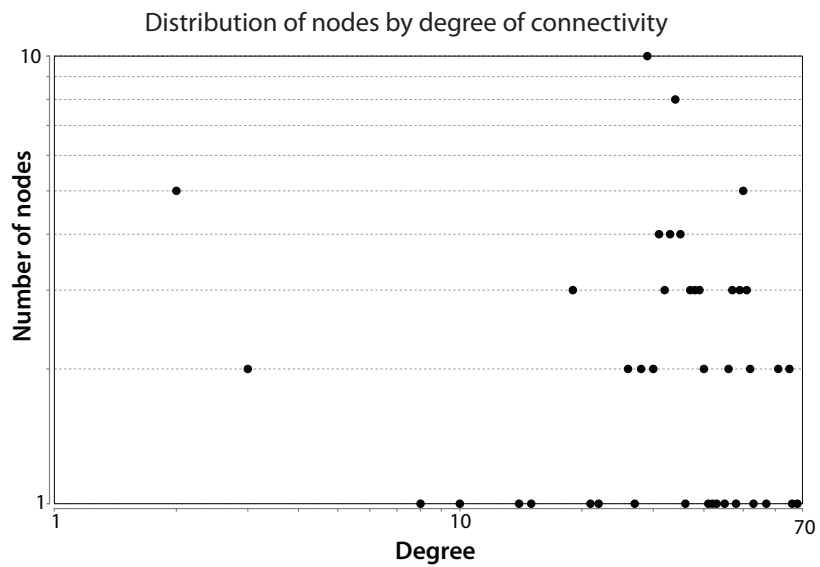

**Supp. Fig 1j:** Network view of Poliovirus type 1 covariance network generated from 63 full-length polyprotein sequences. The distribution of nodes by degree of connectivity is shown in the bottom panel.

## Hepatitis E virus (genotype 3) covariance network

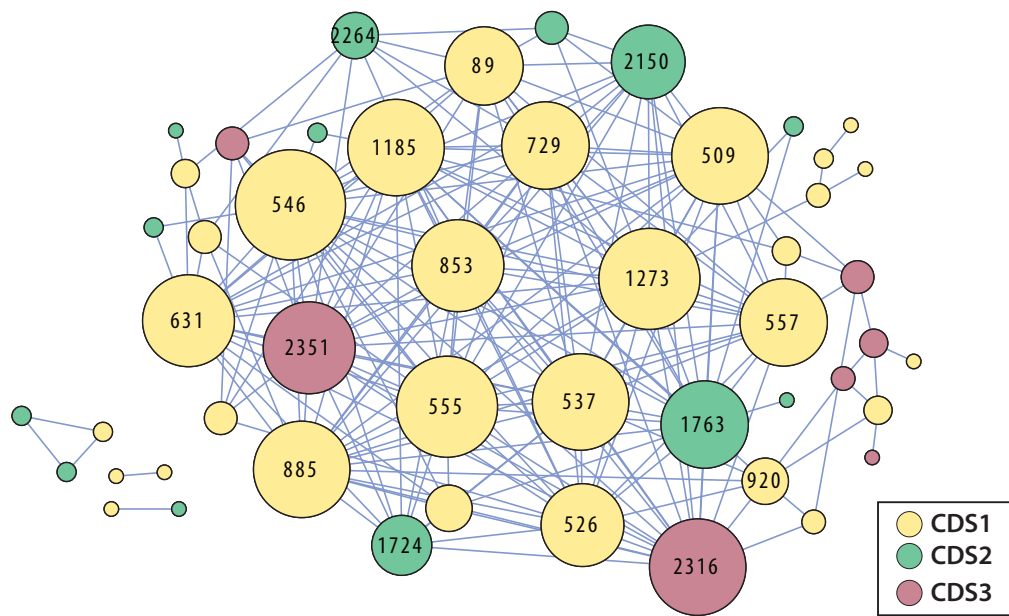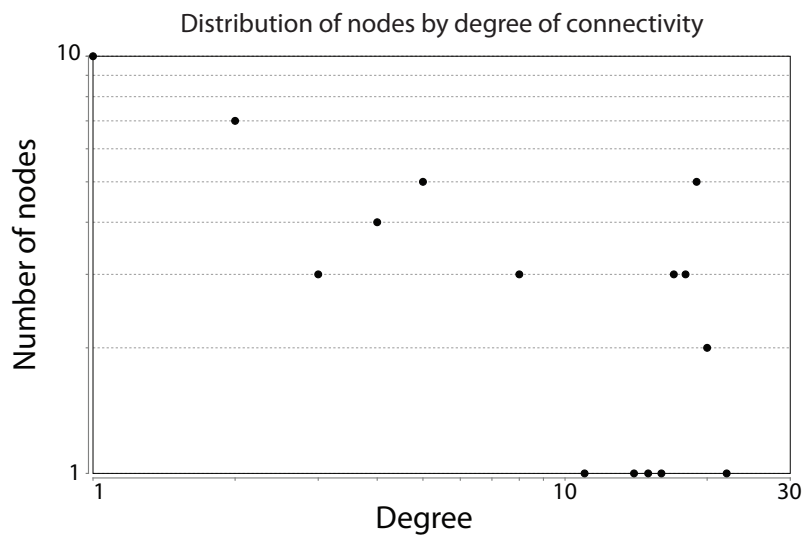

**Supp. Fig 1k:** Network view of Hepatitis E virus covariance network generated from 41 full-length concatenated protein sequences. The distribution of nodes by degree of connectivity is shown in the bottom panel.

# Rabies virus covariance network

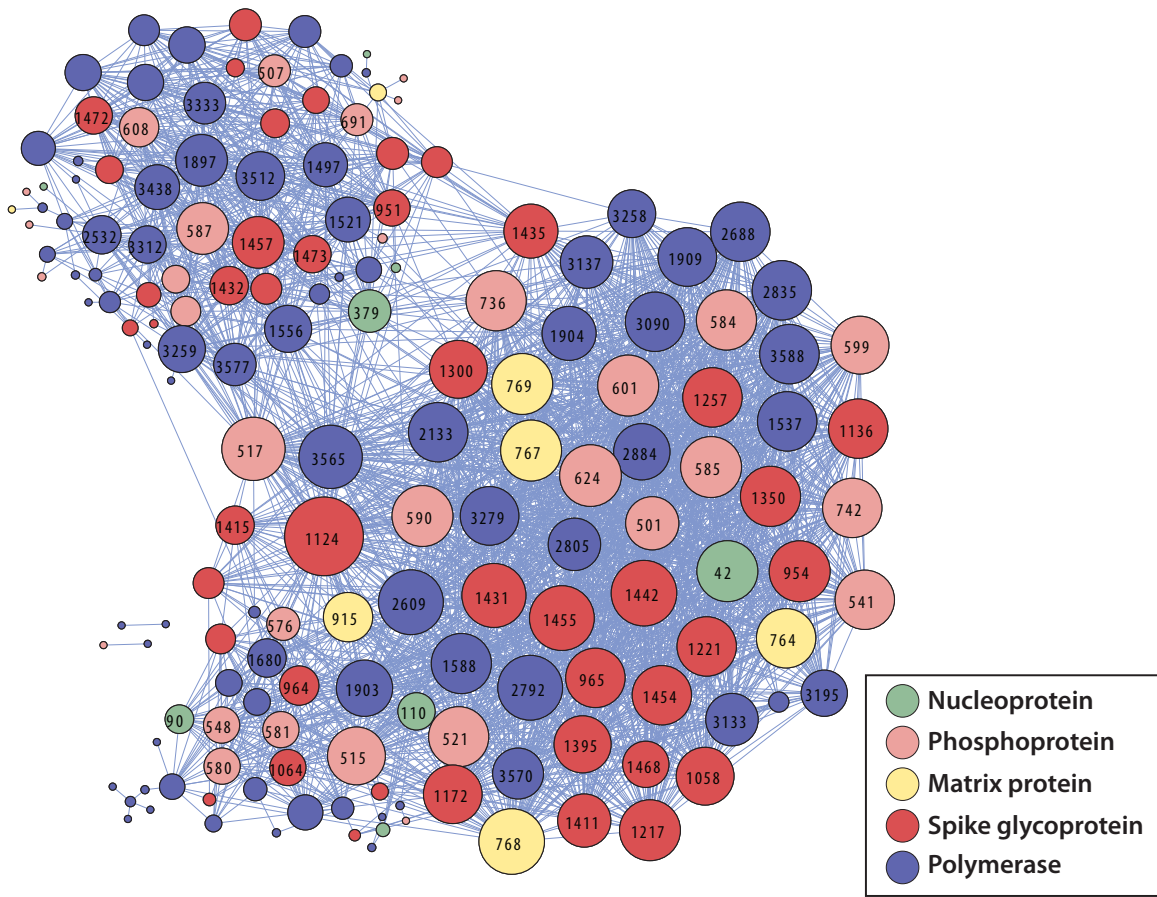

Distribution of nodes by degree of connectivity

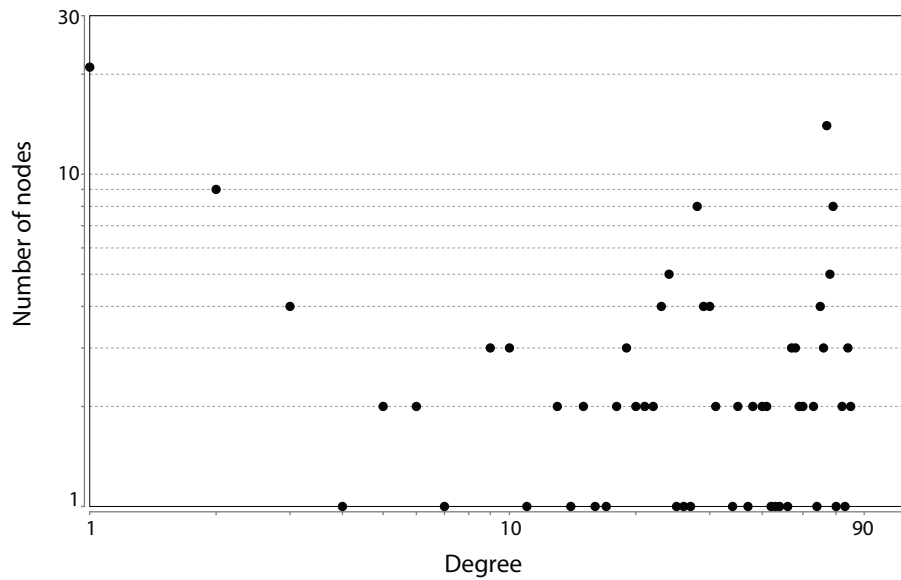

Supp. Fig 1I: Network view of Rabies virus covariance network generated from 26 full-length concatenated protein sequences. The distribution of nodes by degree of connectivity is shown in the bottom panel.

## Hepatitis Delta virus covariance network

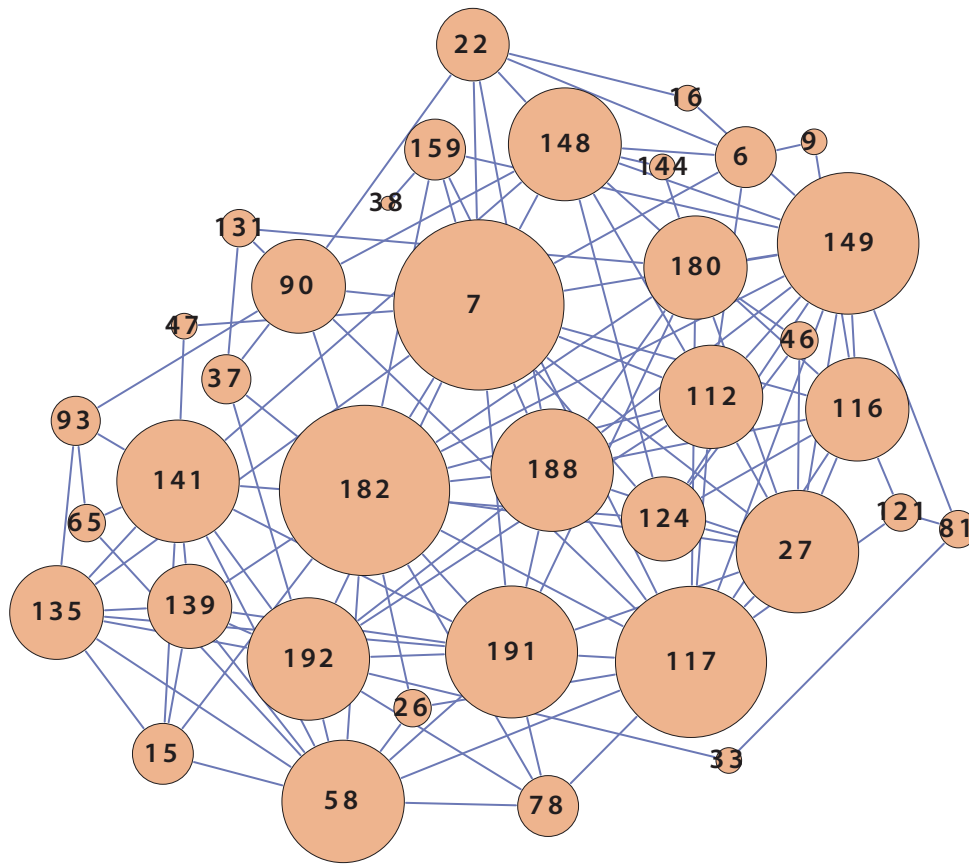

Distribution of nodes by degree of connectivity

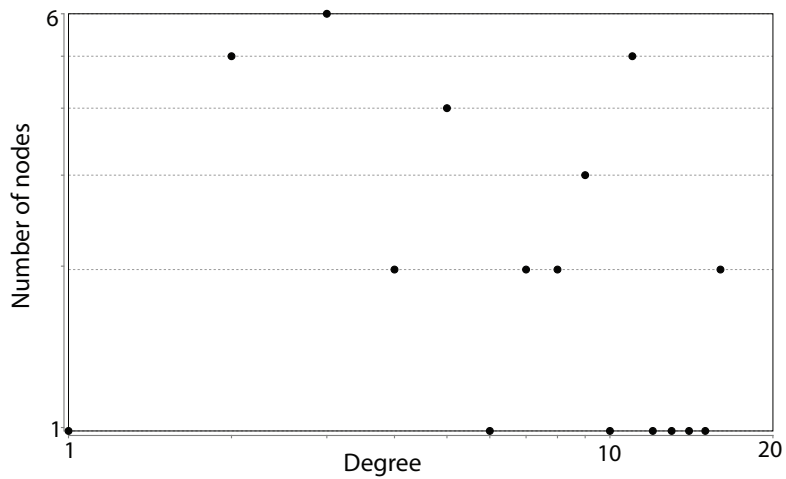

**Supp. Fig 1m:** Network view of Hepatitis Delta virus covariance network generated from 75 small antigen protein sequences. The distribution of nodes by degree of connectivity is shown in the bottom panel.



## Parvovirus B19 virus genotype 2 covariance network

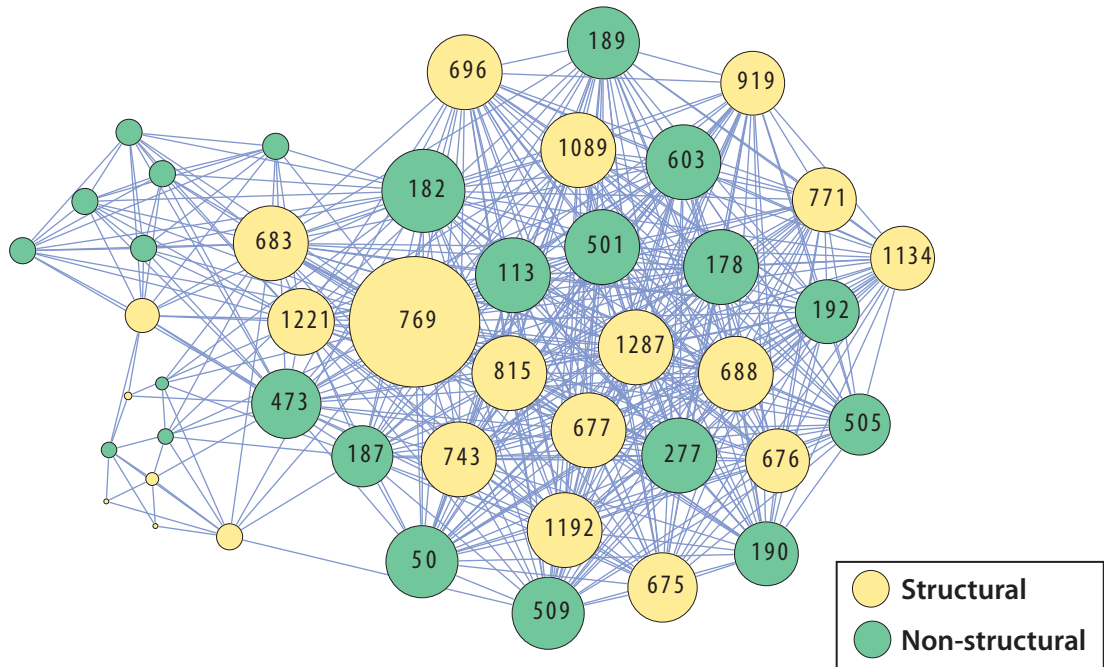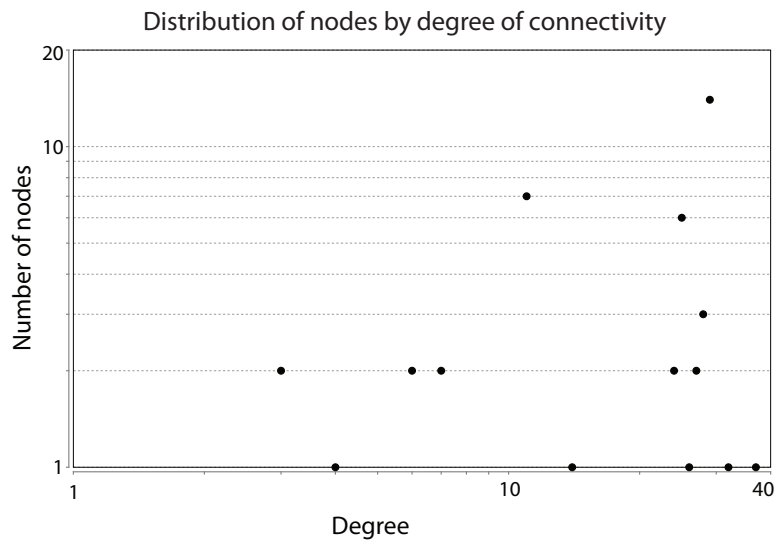

**Supp. Fig 1n:** Network view of Parvo B19 virus covariance network generated from 20 full-length polyprotein sequences. The distribution of nodes by degree of connectivity is shown in the bottom panel.

# Hepatitis B virus genotype C covariance network

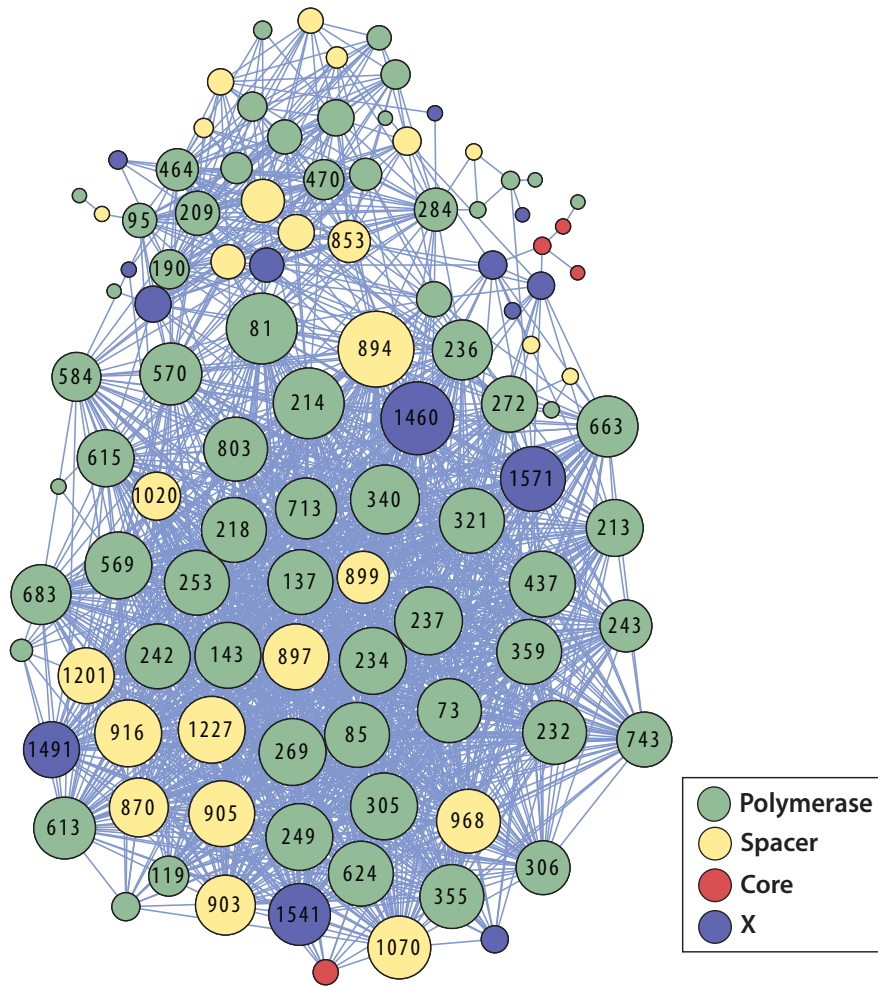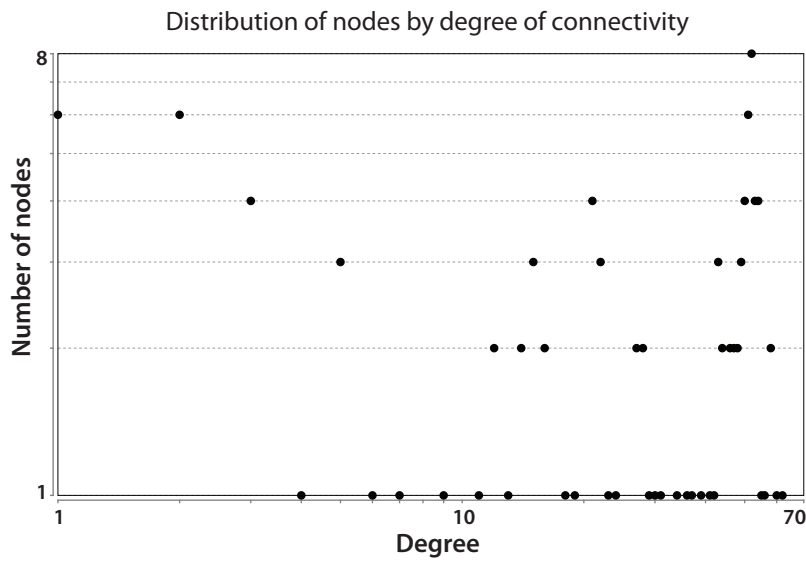

**Supp. Fig 1o:** Network view of Hepatitis B genotype C virus covariance network generated from 100 full-length concatenated protein sequences. The distribution of nodes by degree of connectivity is shown in the bottom panel.

# HBV Genotype D network

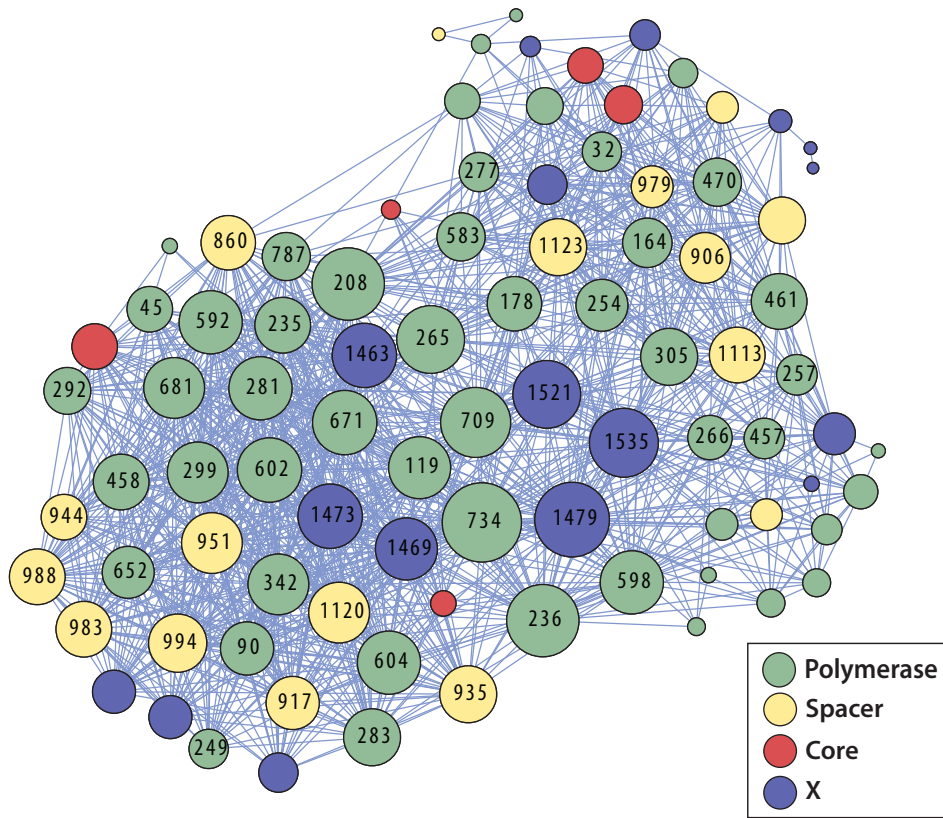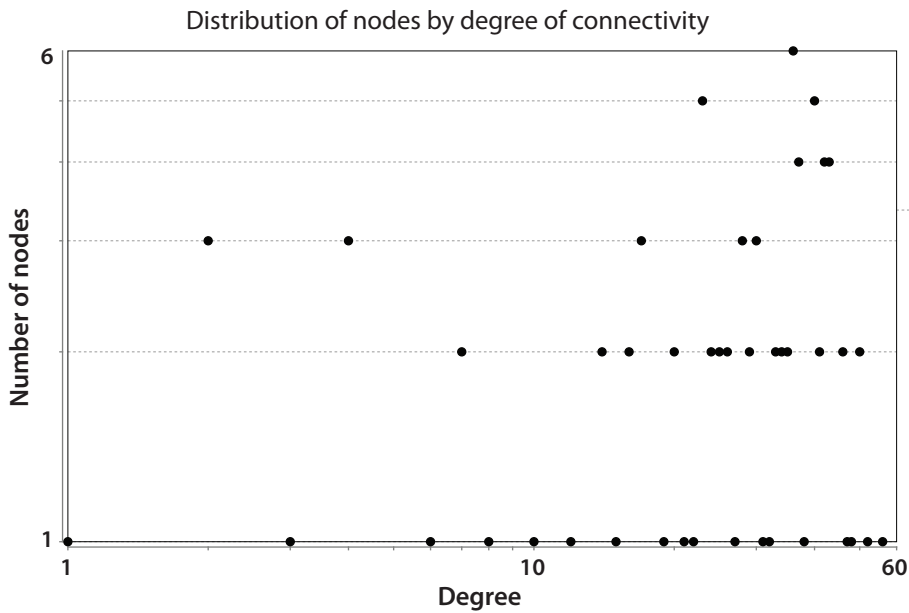

Supp. Fig 1p: Network view of Hepatitis B genotype C virus covariance network generated from 100 full-length concatenated protein sequences. The distribution of nodes by degree of connectivity is shown in the bottom panel.

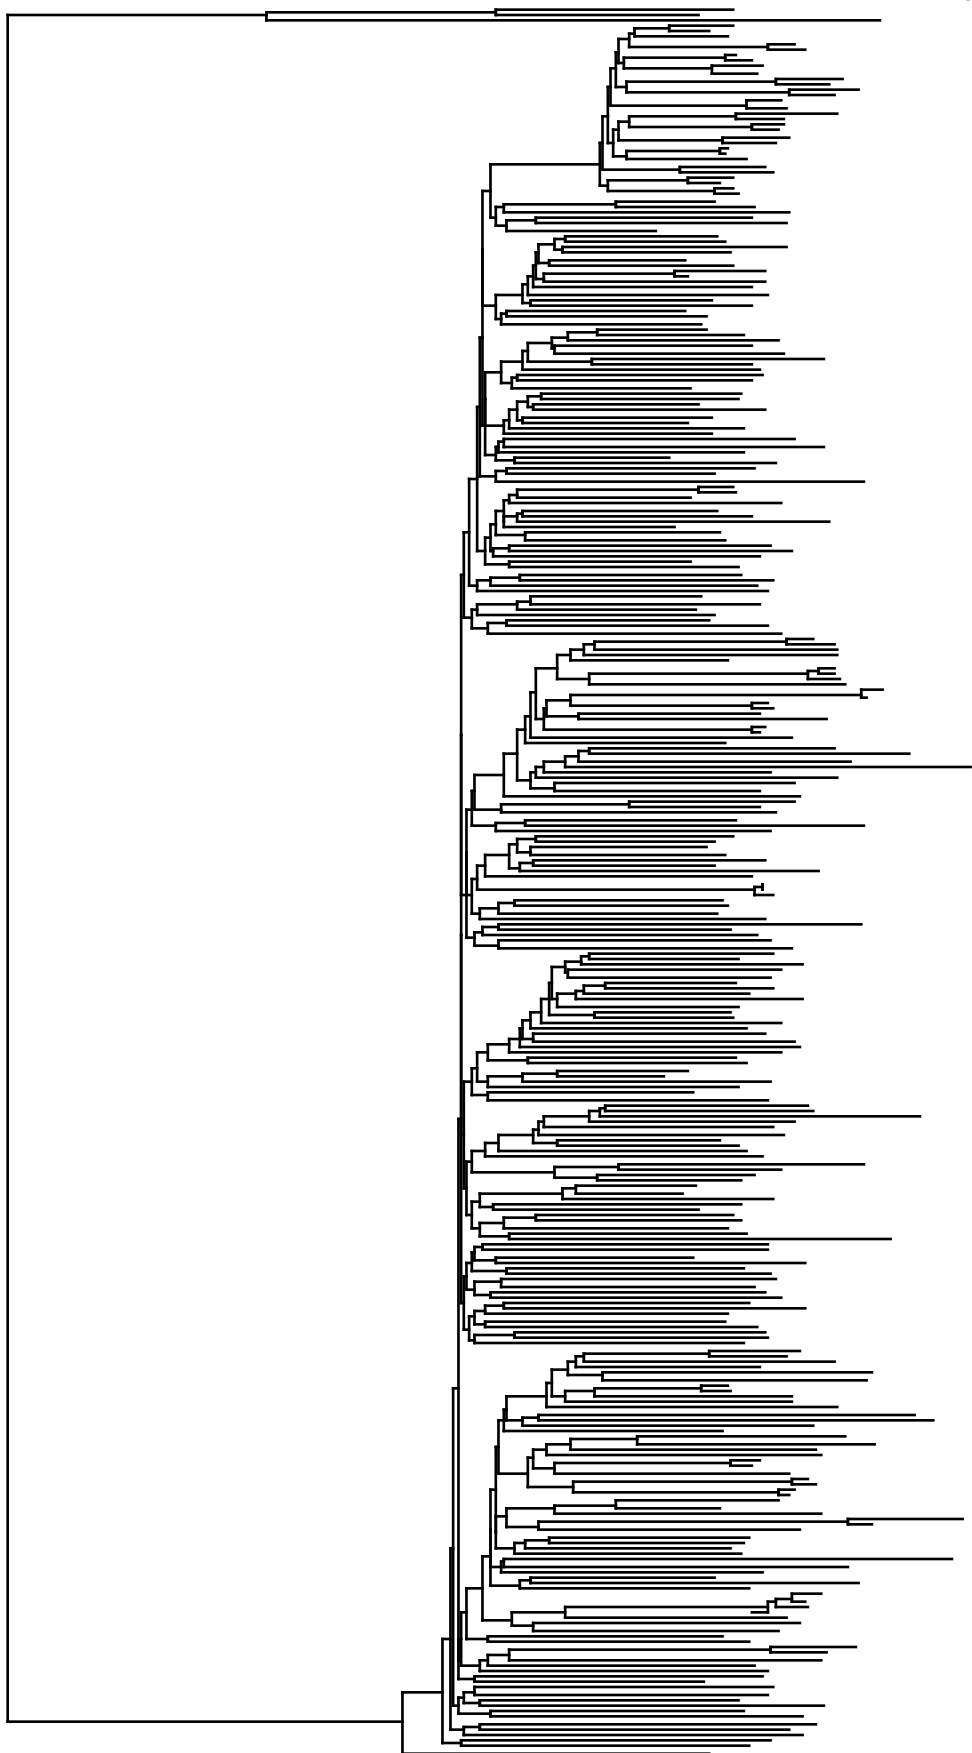

**Supp. Fig 1q:** Phylogenetic tree of 300 HCV 1b polyprotein sequences used to generate the corresponding covariance network.

# HCV genotype 1a

0.005

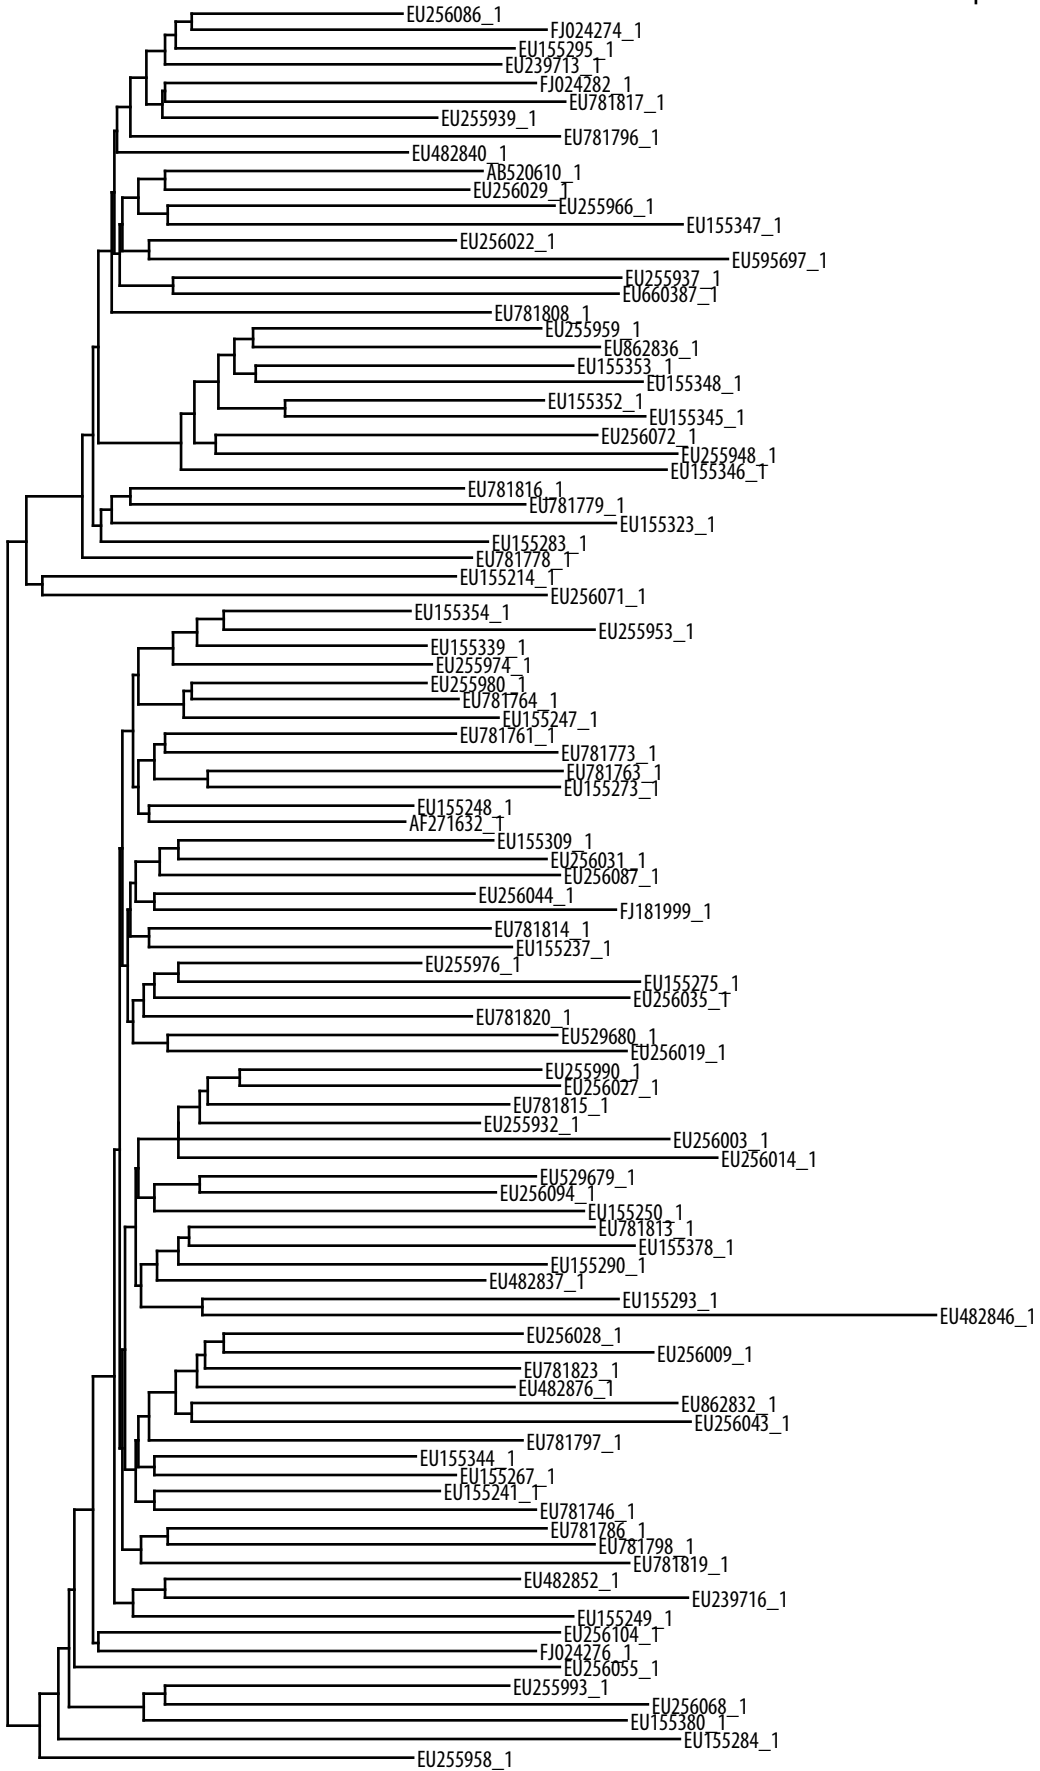

**Supp. Fig 1r:** Phylogenetic tree of 100 HCV 1a polyprotein sequences used to generate the corresponding covariance network.



### HCV genotype 1a (16 sequences)

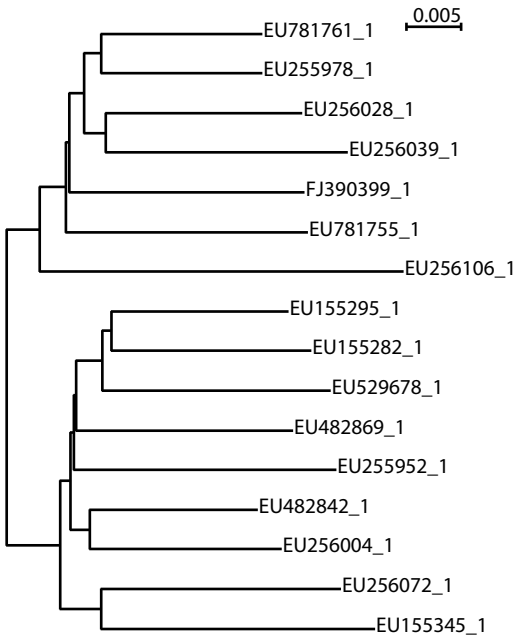

### HCV genotype 1a (32 sequences)

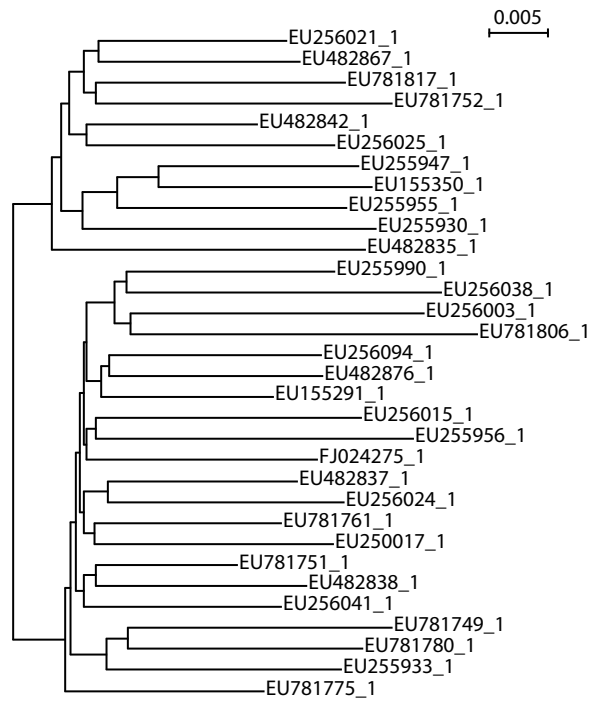

### HCV genotype 1a (47 sequences)

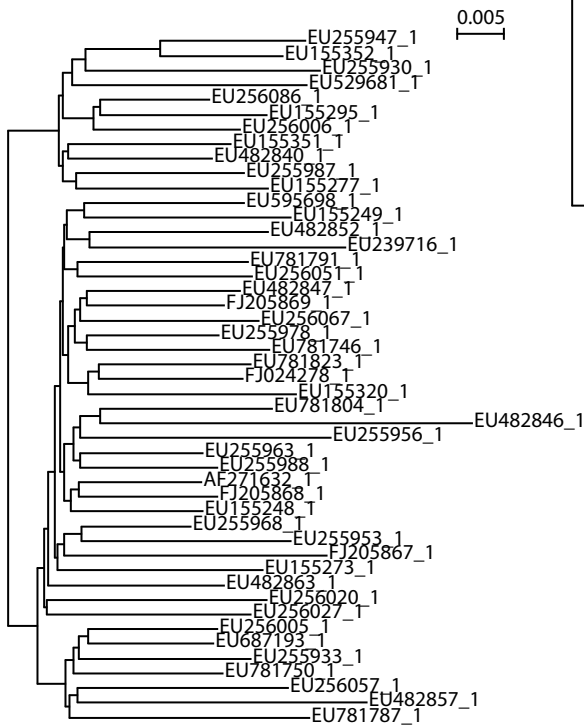

**Supp. Fig 1s:** Phylogenetic trees of 16, 32 and 47 HCV 1a polyprotein sequences used to generate the corresponding covariance networks.

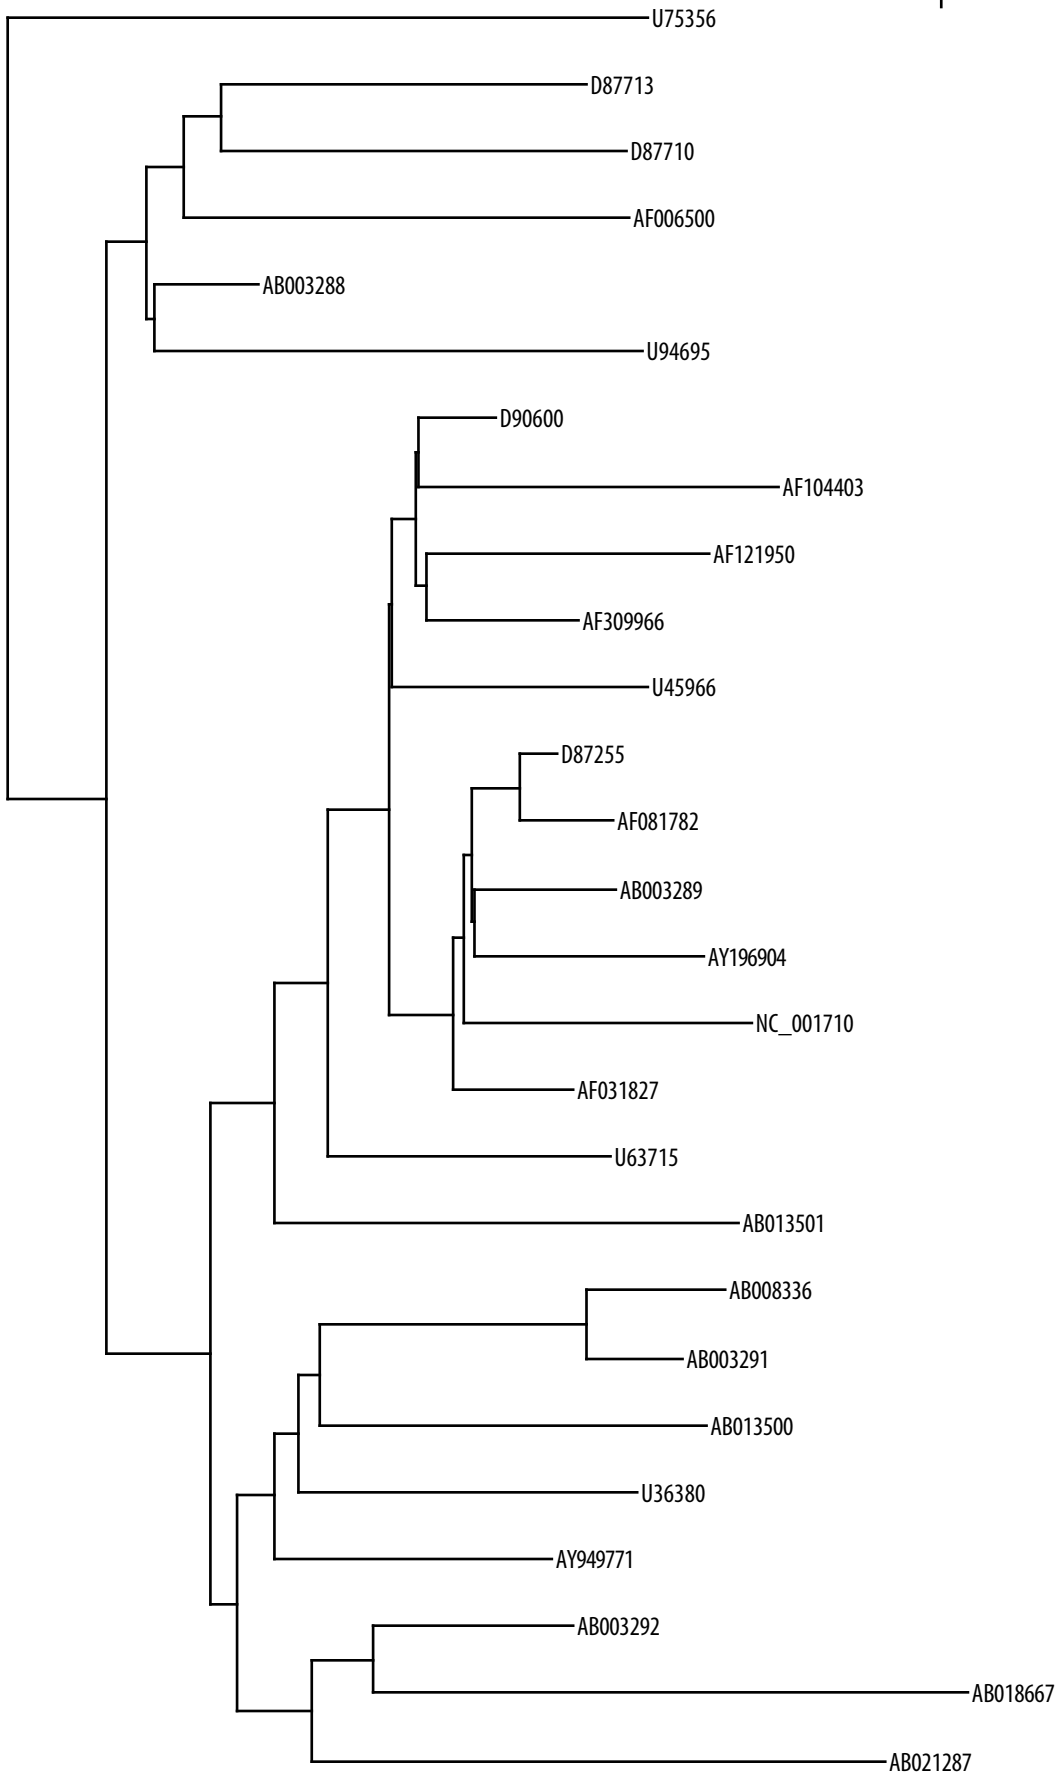

**Supp. Fig 1t:** Phylogenetic tree of 27 GBV-C polyprotein sequences used to generate the corresponding covariance network.

# Dengue virus type 2

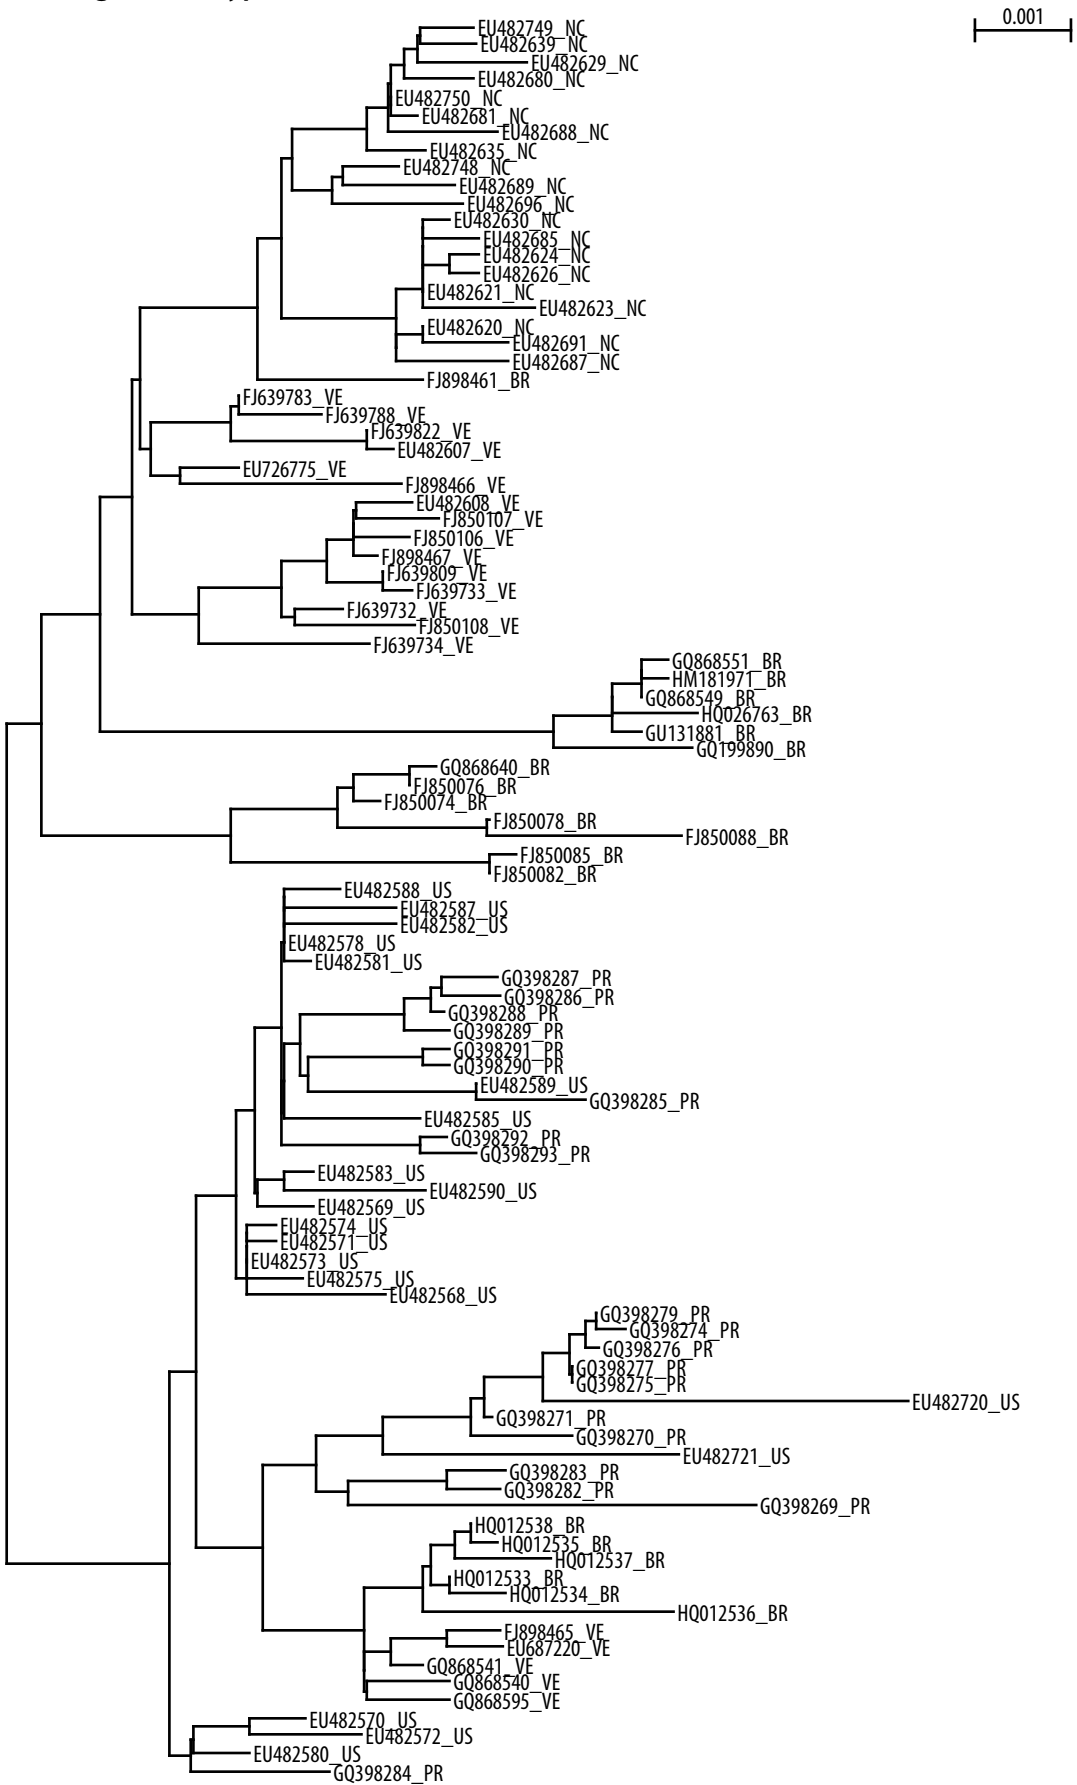

Supp. Fig 1u: Phylogenetic tree of 100 DV-2 polyprotein sequences used to generate the corresponding covariance network.

West Nile Virus

0.005

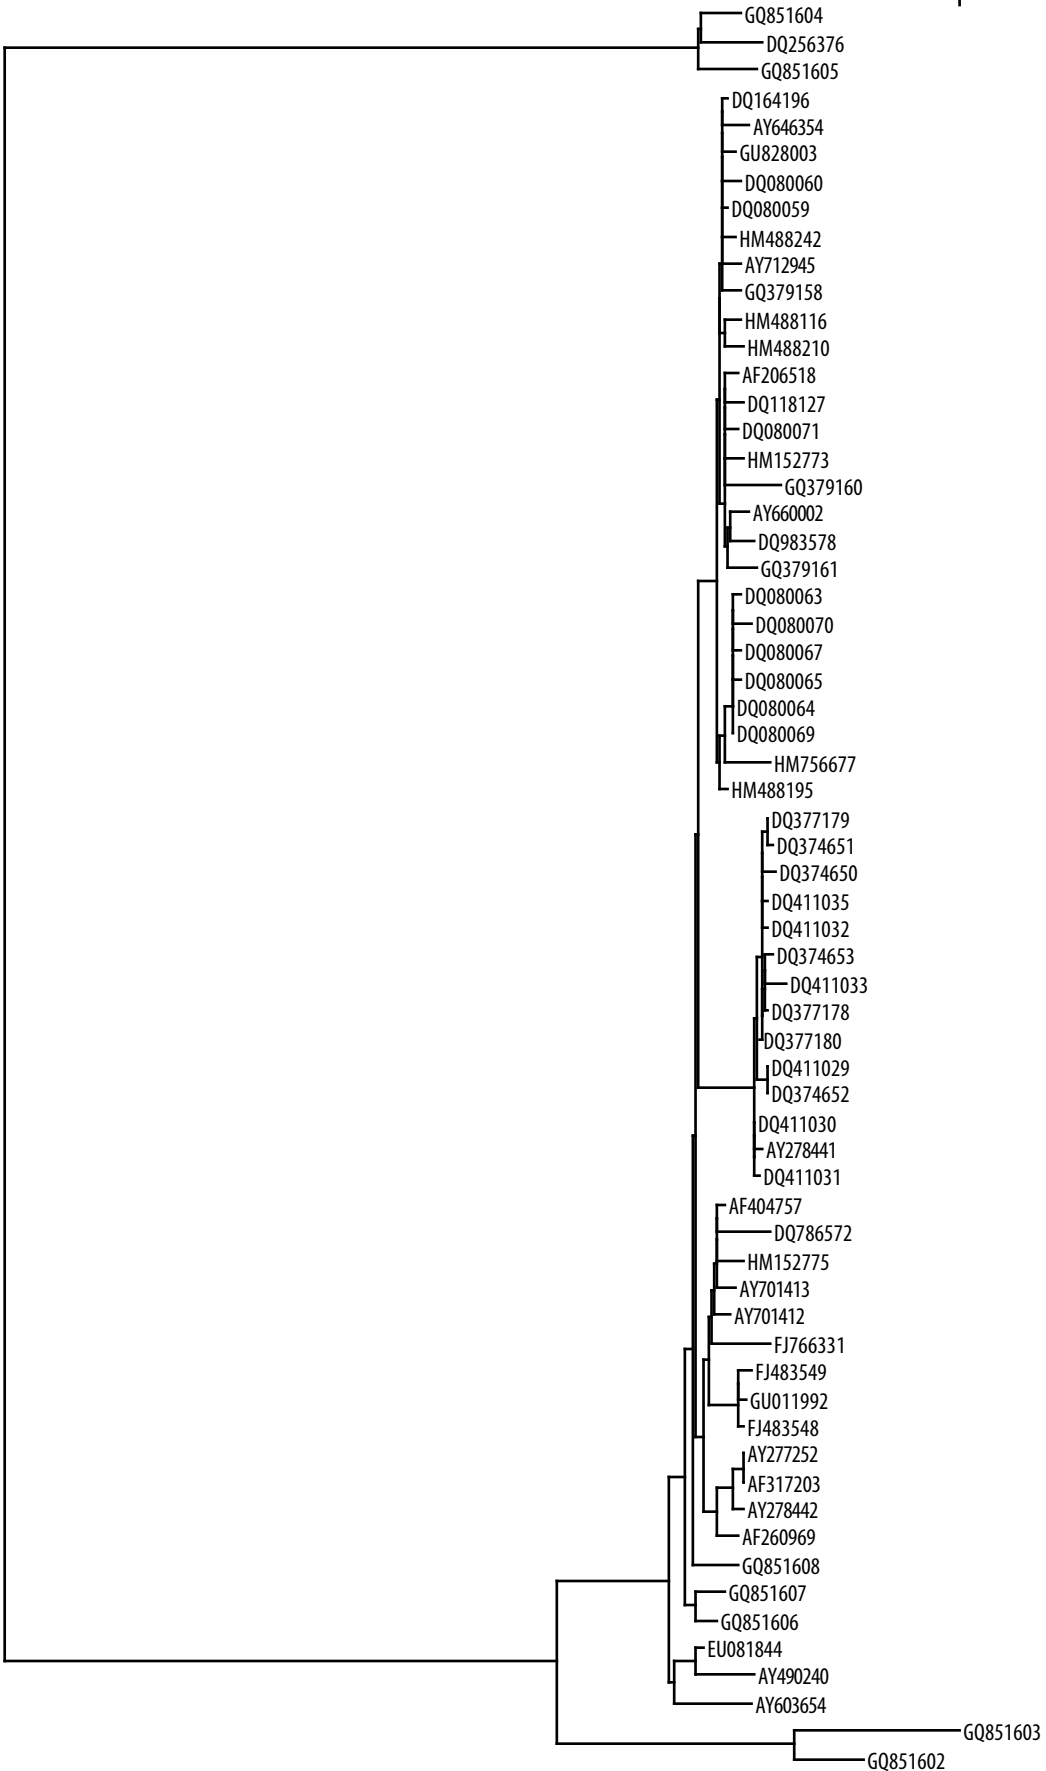

Supp. Fig 1v: Phylogenetic tree of 64 WNV polyprotein sequences used to generate the corresponding covariance network.

Hepatitis A virus

0.002

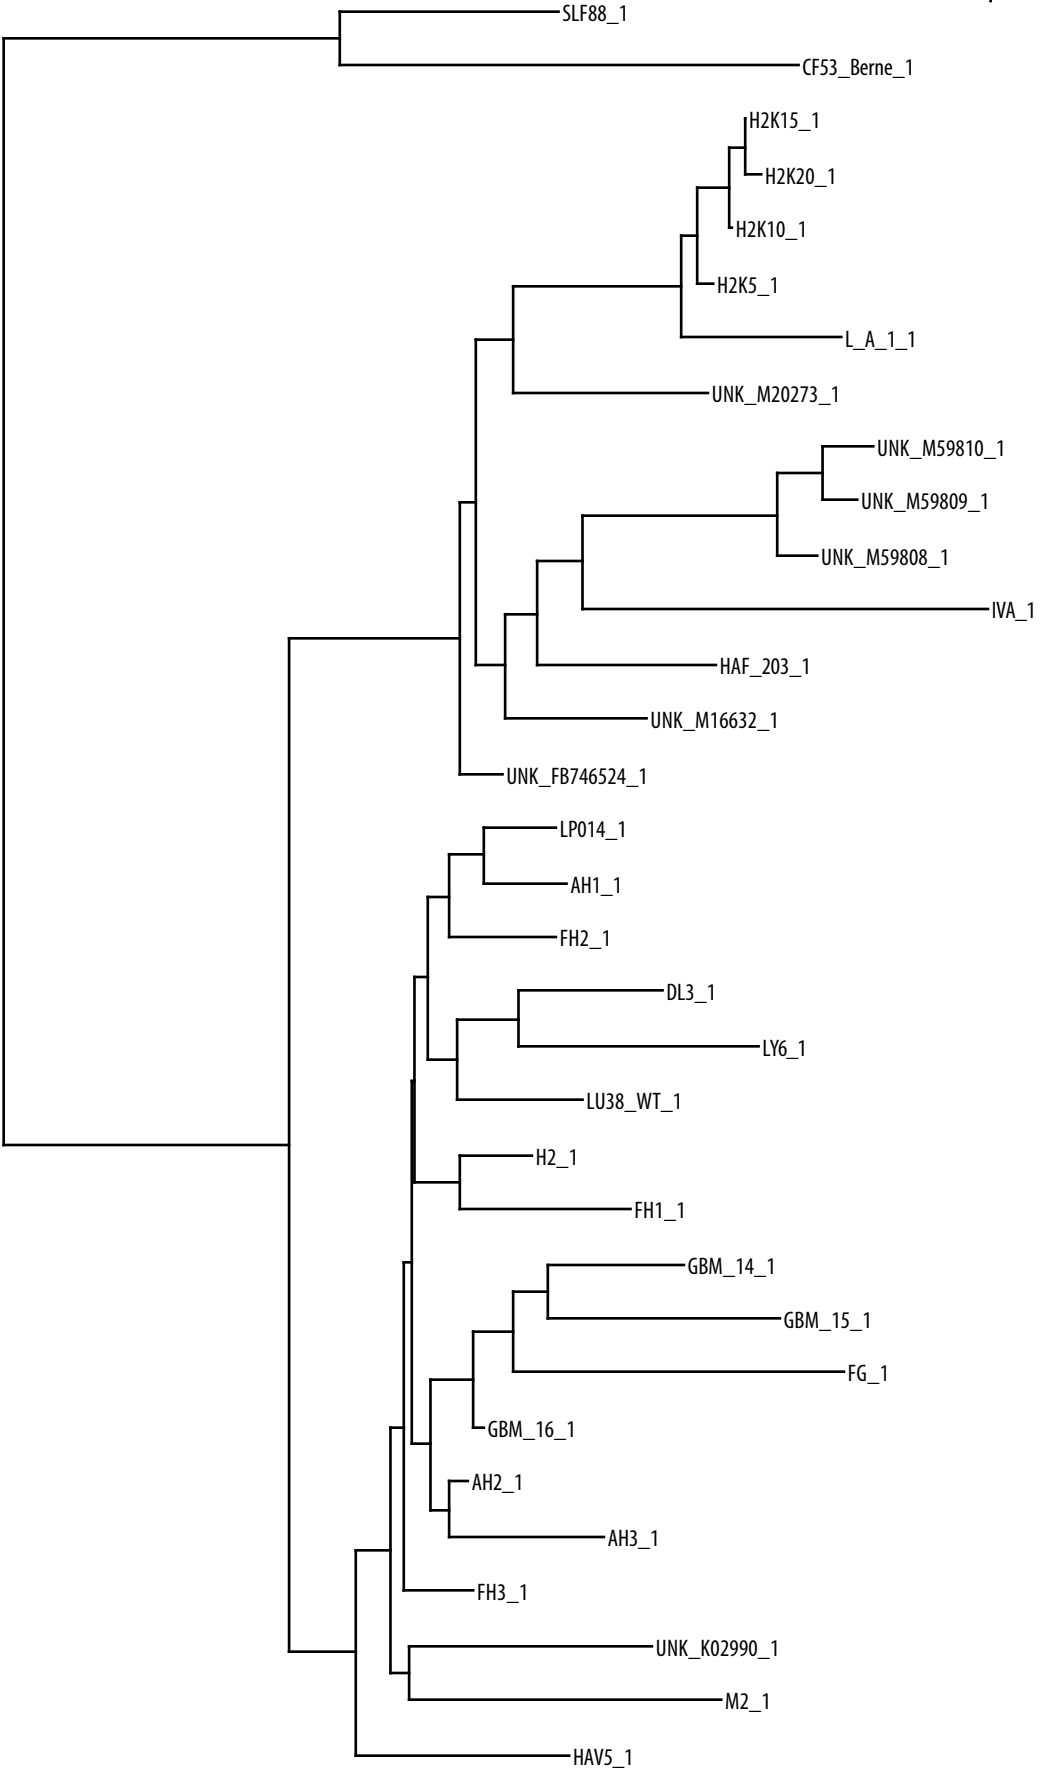

Supp. Fig 1w: Phylogenetic tree of 33 HAV polyprotein sequences used to generate the corresponding covariacencenetwork.



# Poliovirus type 1

0.005

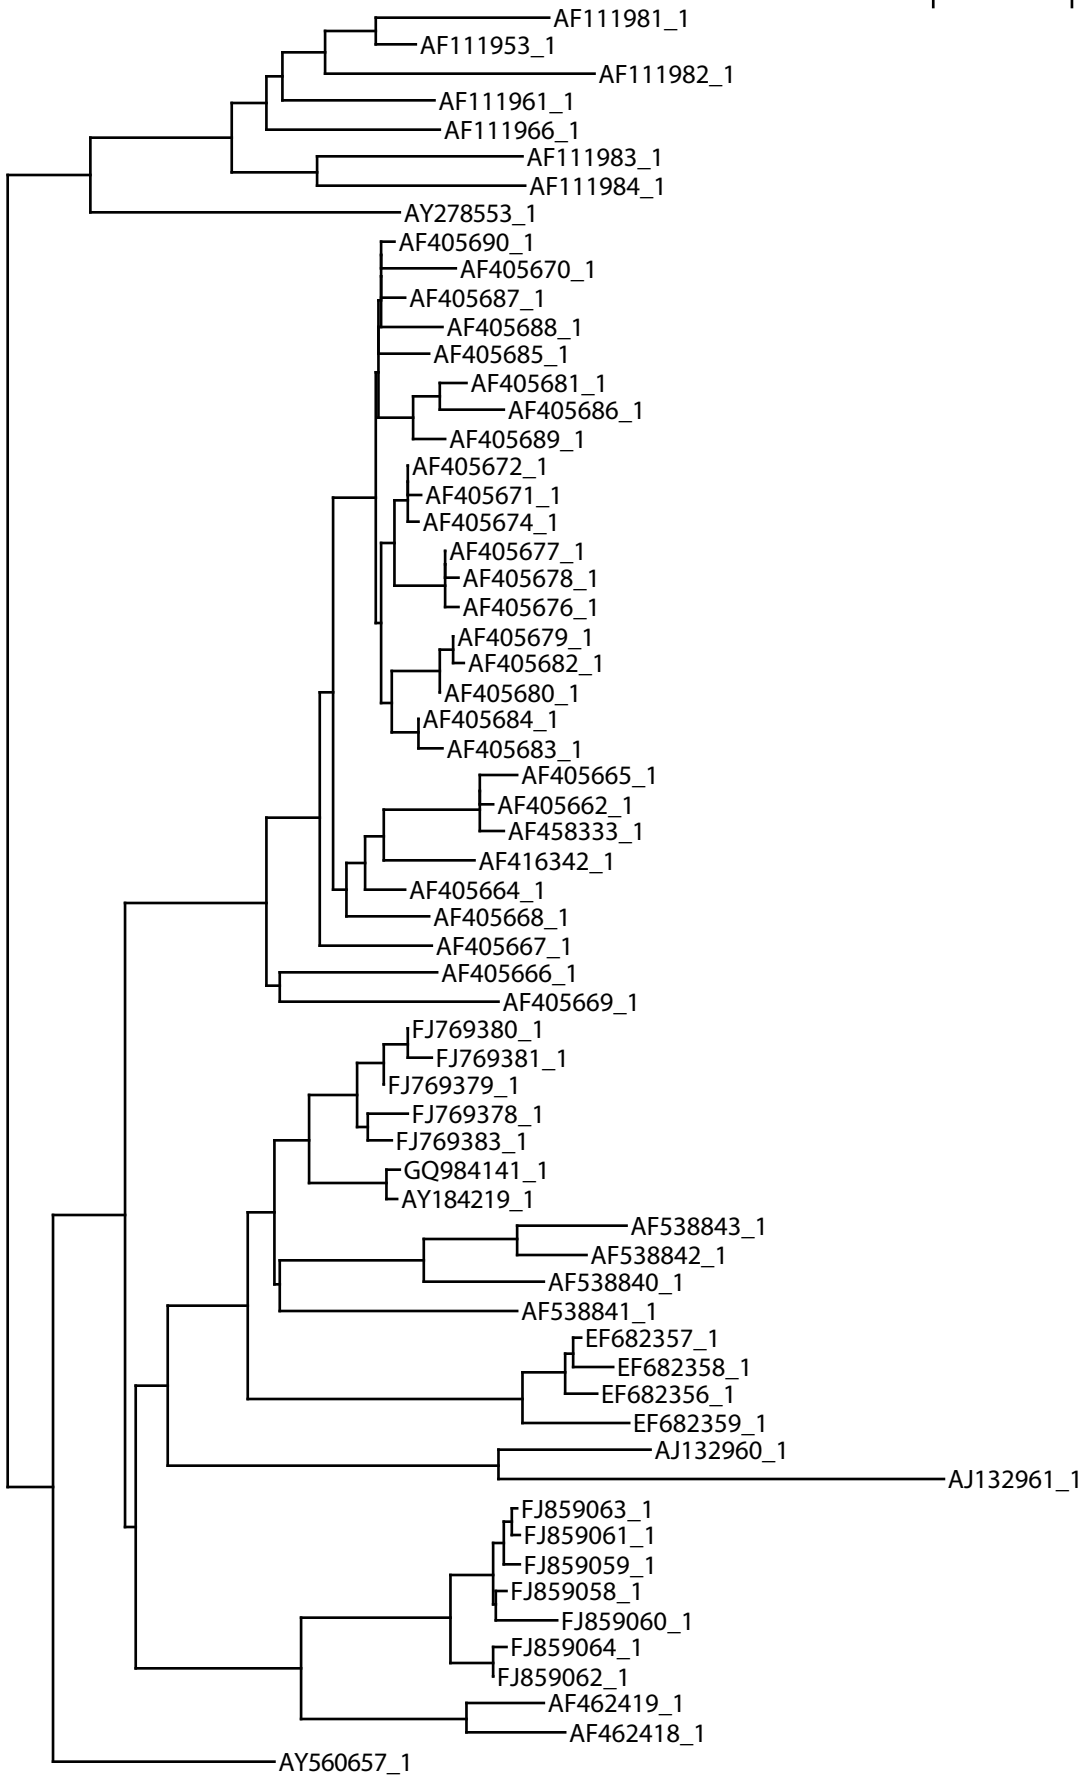

**Supp. Fig 1x:** Phylogenetic tree of 63 Poliovirus type 1 polyprotein sequences used to generate the corresponding covariance network.

# Hepatitis E virus

0.002

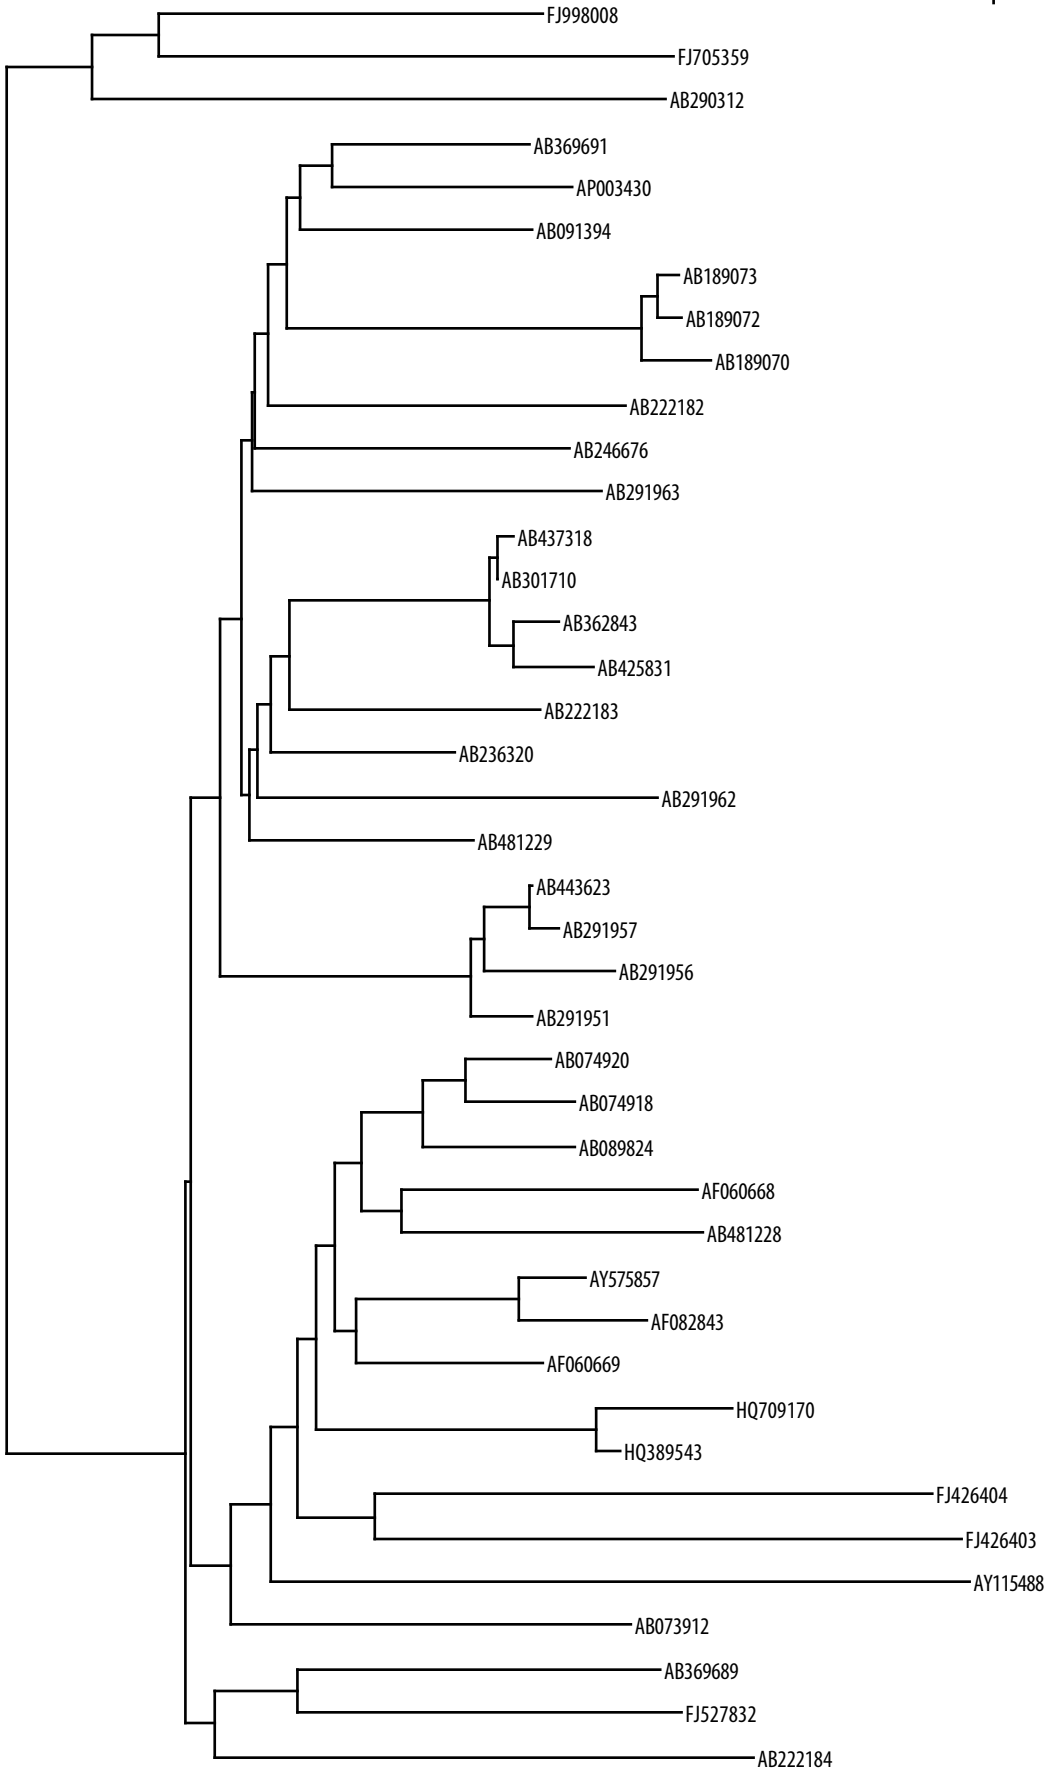

**Supp. Fig 1y:** Phylogenetic tree of 41 HEV type 3 concatenated protein sequences used to generate the corresponding covariance network.

# Crimean-Congo Hemorrhagic Fever virus

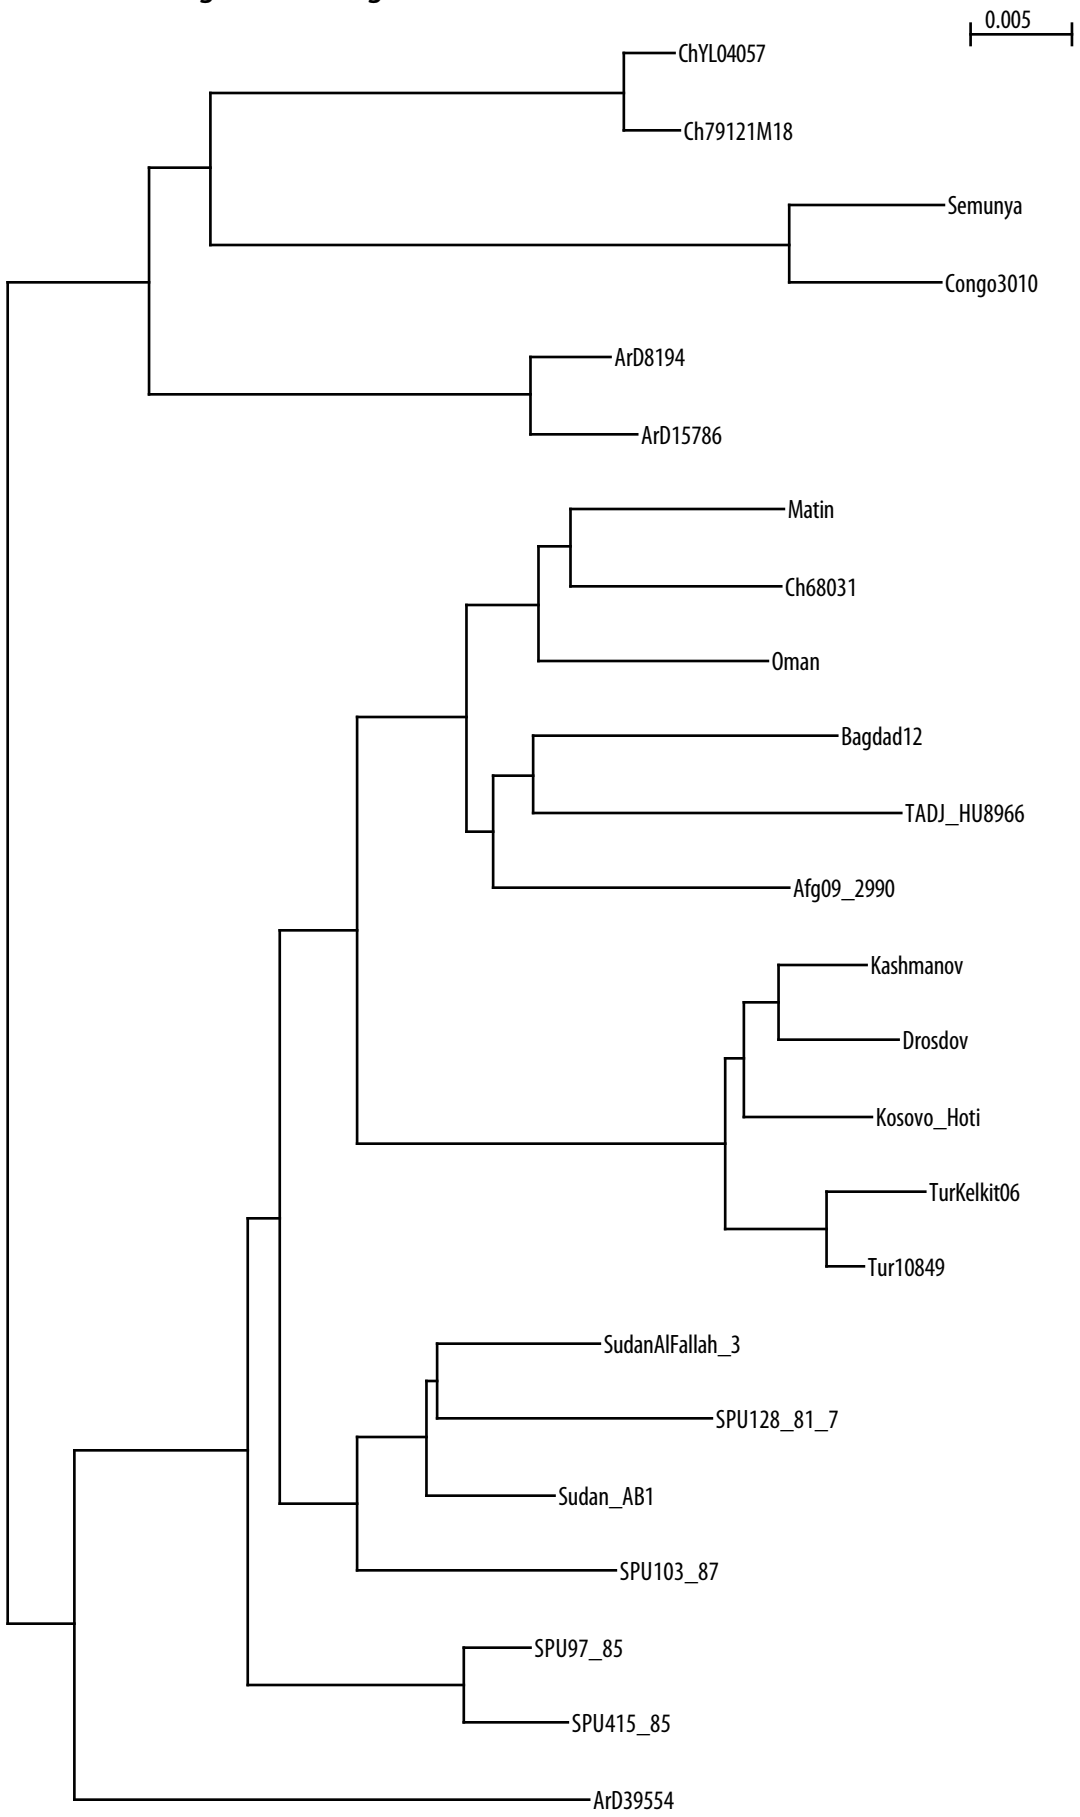

**Supp. Fig 1z:** Phylogenetic tree of 24 CCHV concatenated protein sequences used to generate the corresponding covariance network.

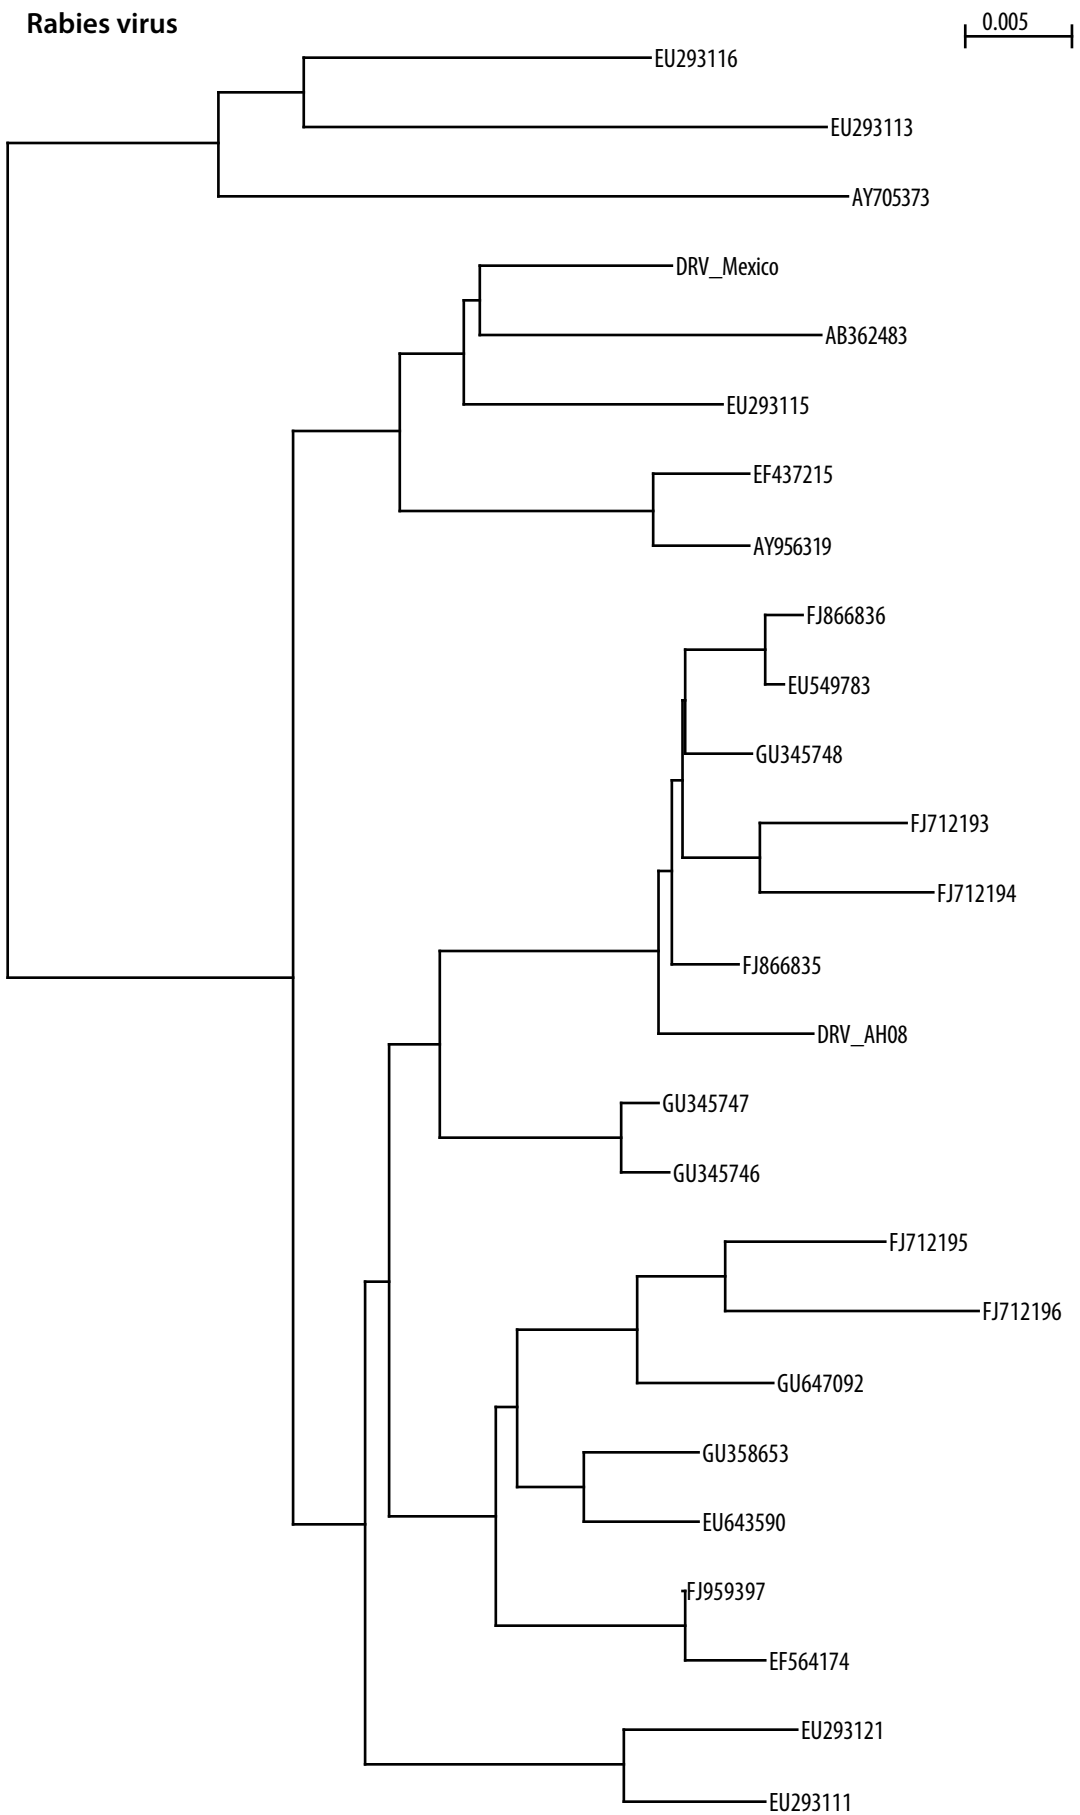

**Supp. Fig 1aa:** Phylogenetic tree of 26 rabies virus protein sequences used to generate the corresponding covariance network.

# Hepatitis Delta virus

0.02

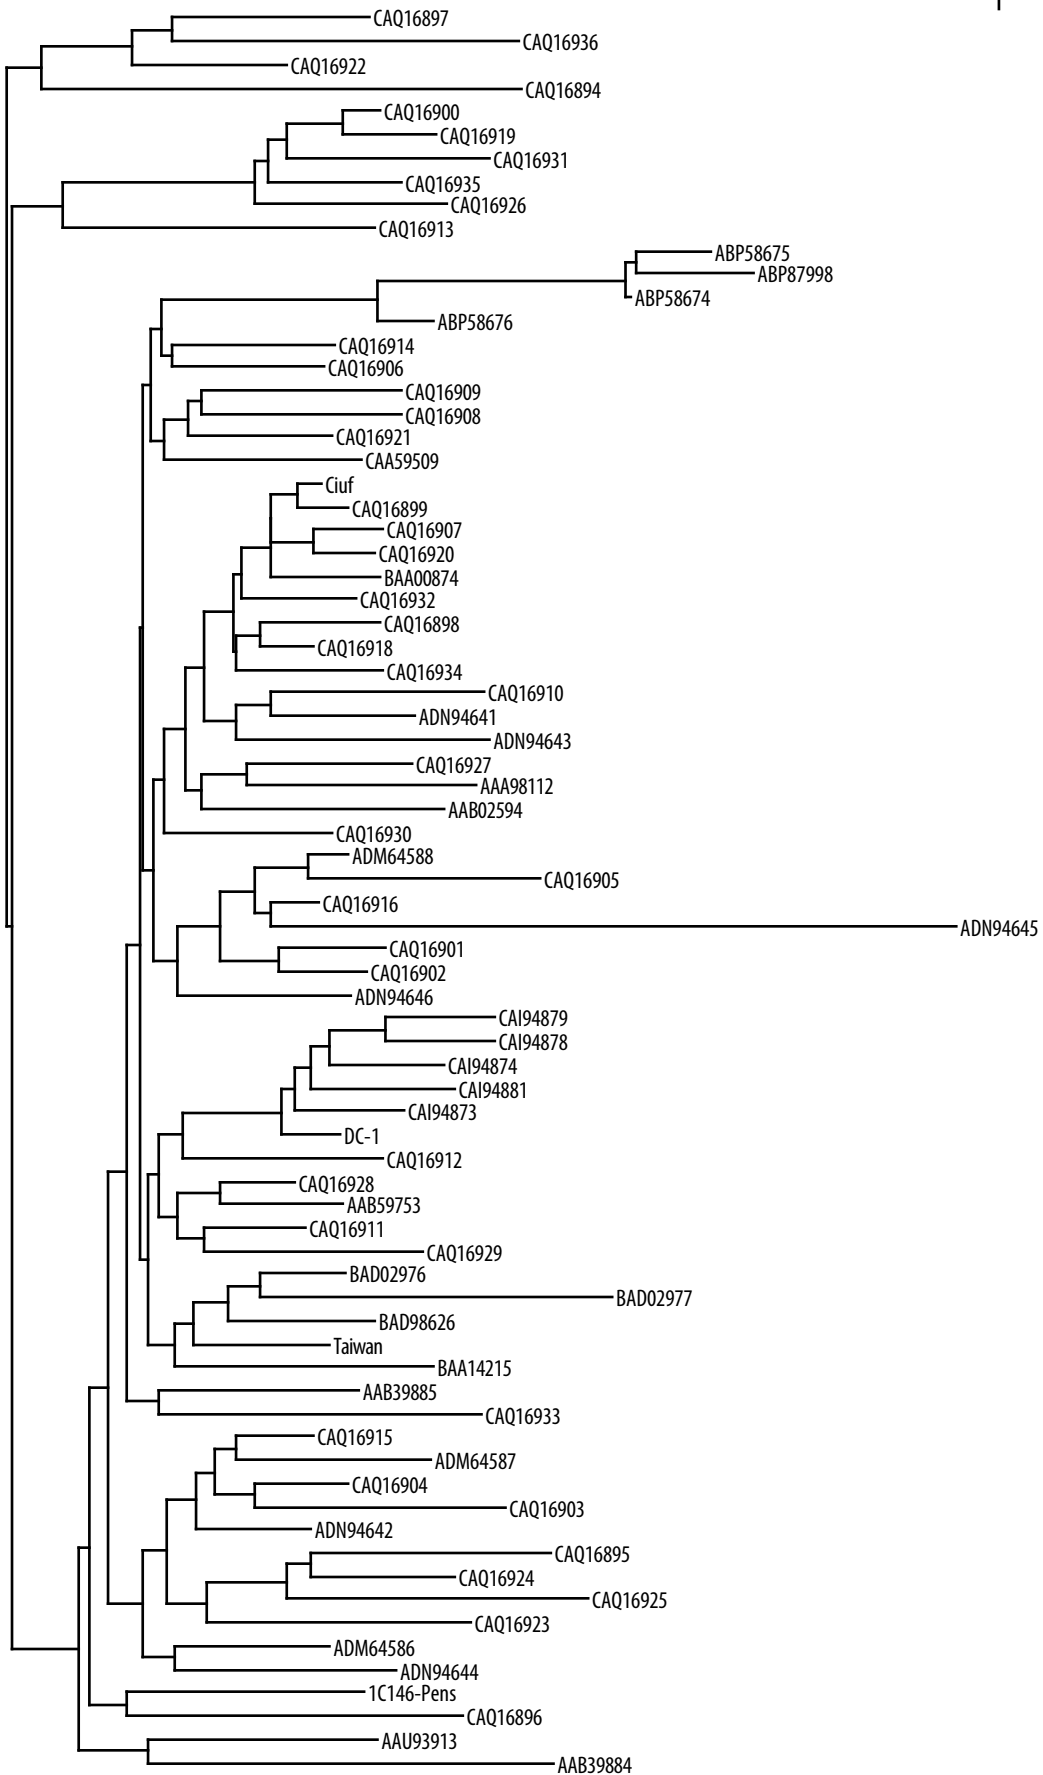

**Supp. Fig 1ab:** Phylogenetic tree of 75 Hepatitis delta protein sequences used to generate the corresponding covariance network.

# Influenza A (H3N2) virus

0.001

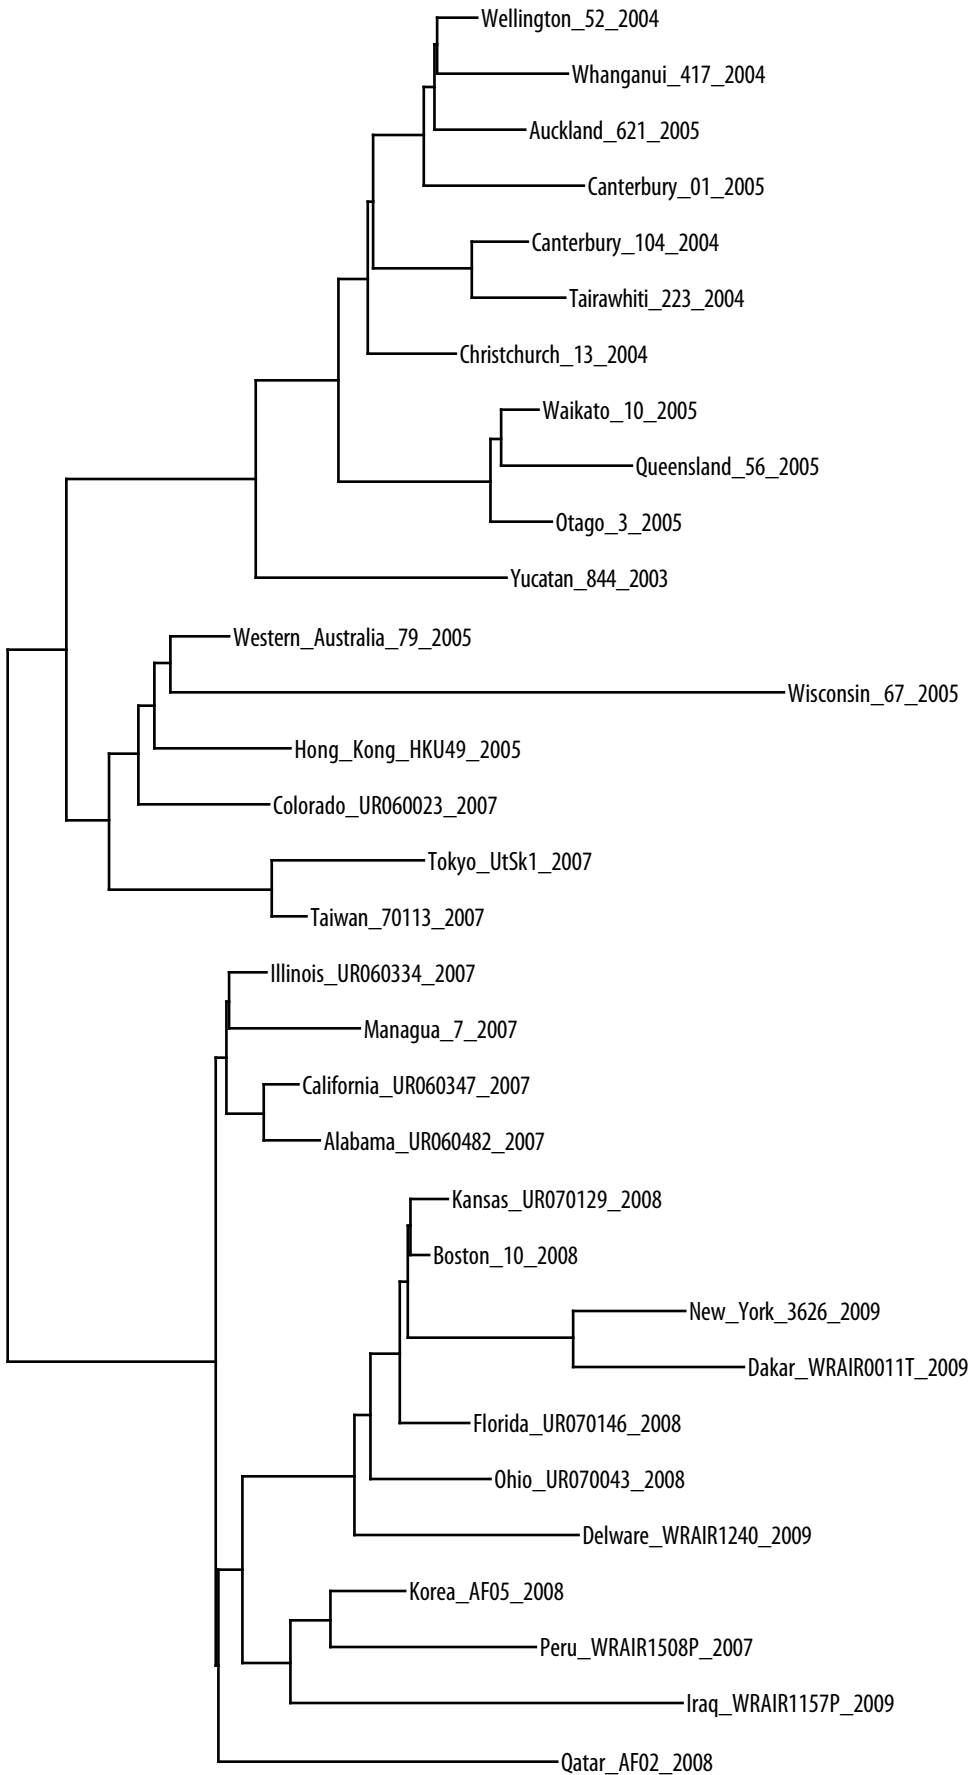

**Supp. Fig 1ac:** Phylogenetic tree of 32 IV-A concatenated protein sequences used to generate the corresponding covariance network.

Parvovirus B19

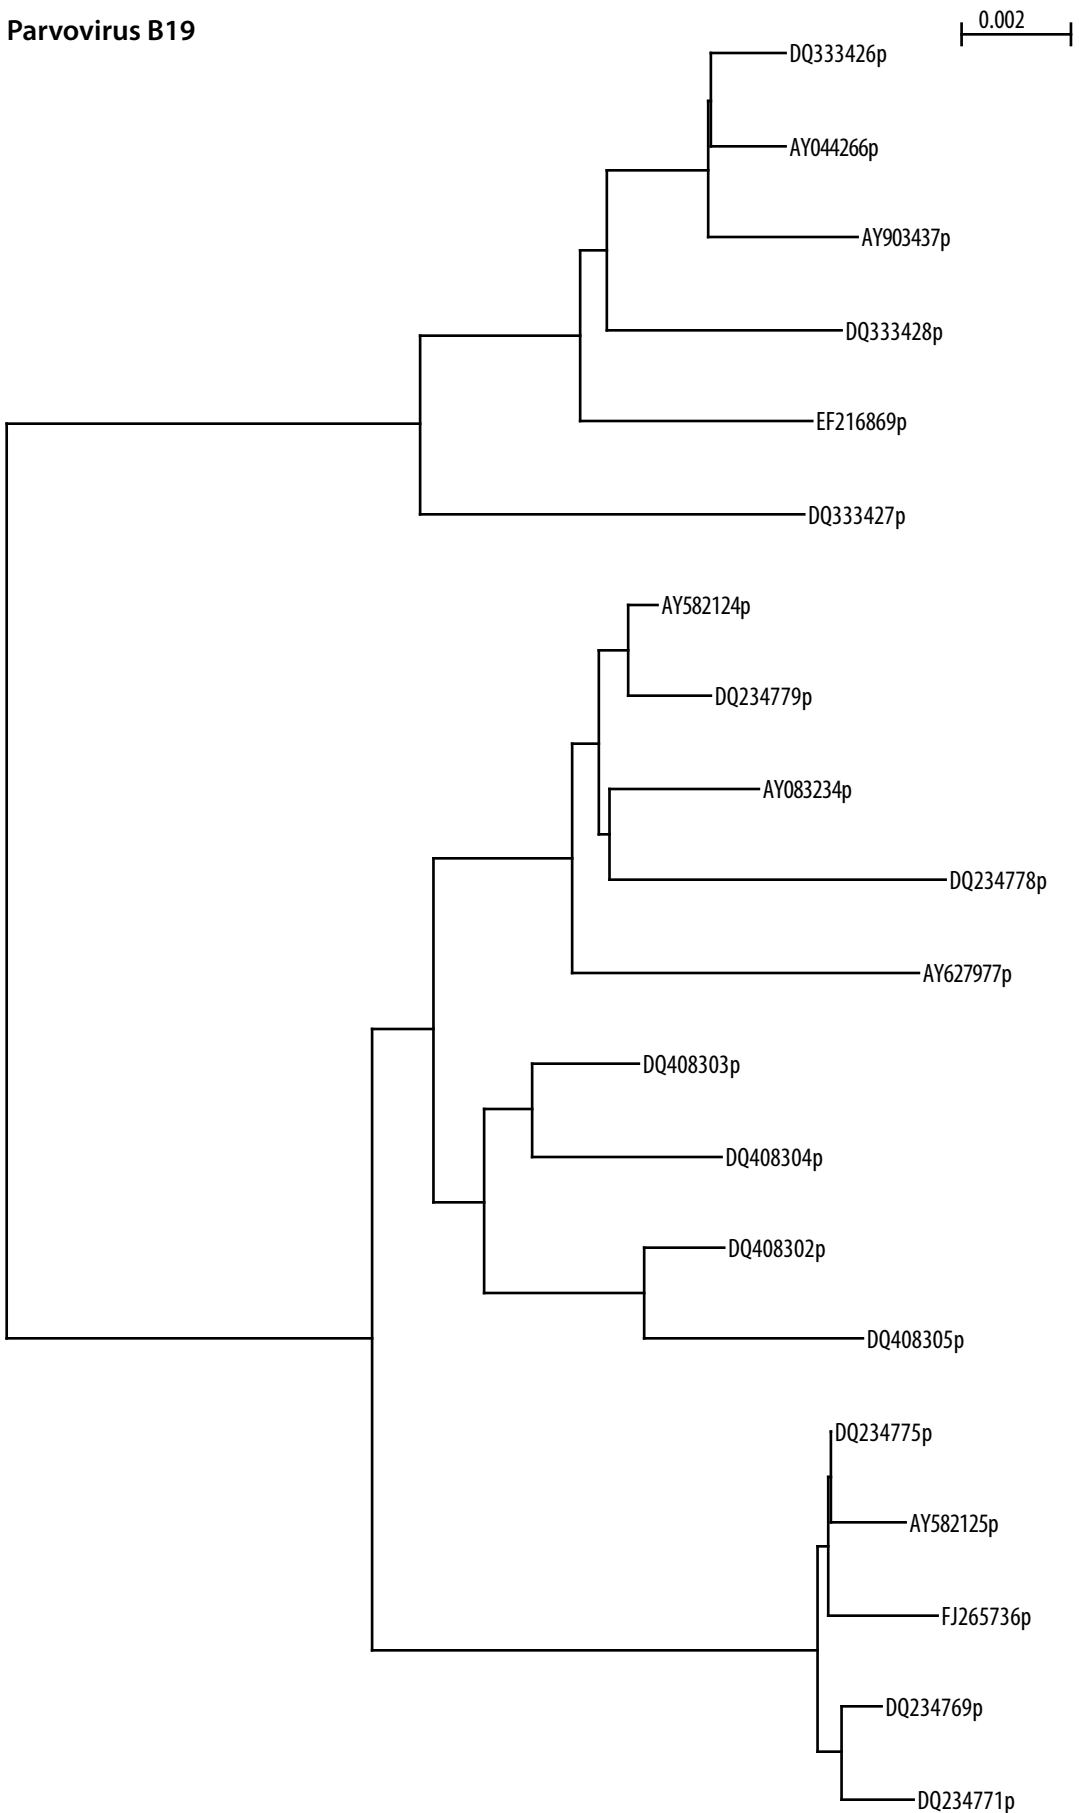

**Supp. Fig 1ad:** Phylogenetic tree of 20 PvB19 protein sequences used to generate the corresponding covariance network.



# Hepatitis B virus genotype B

0.005

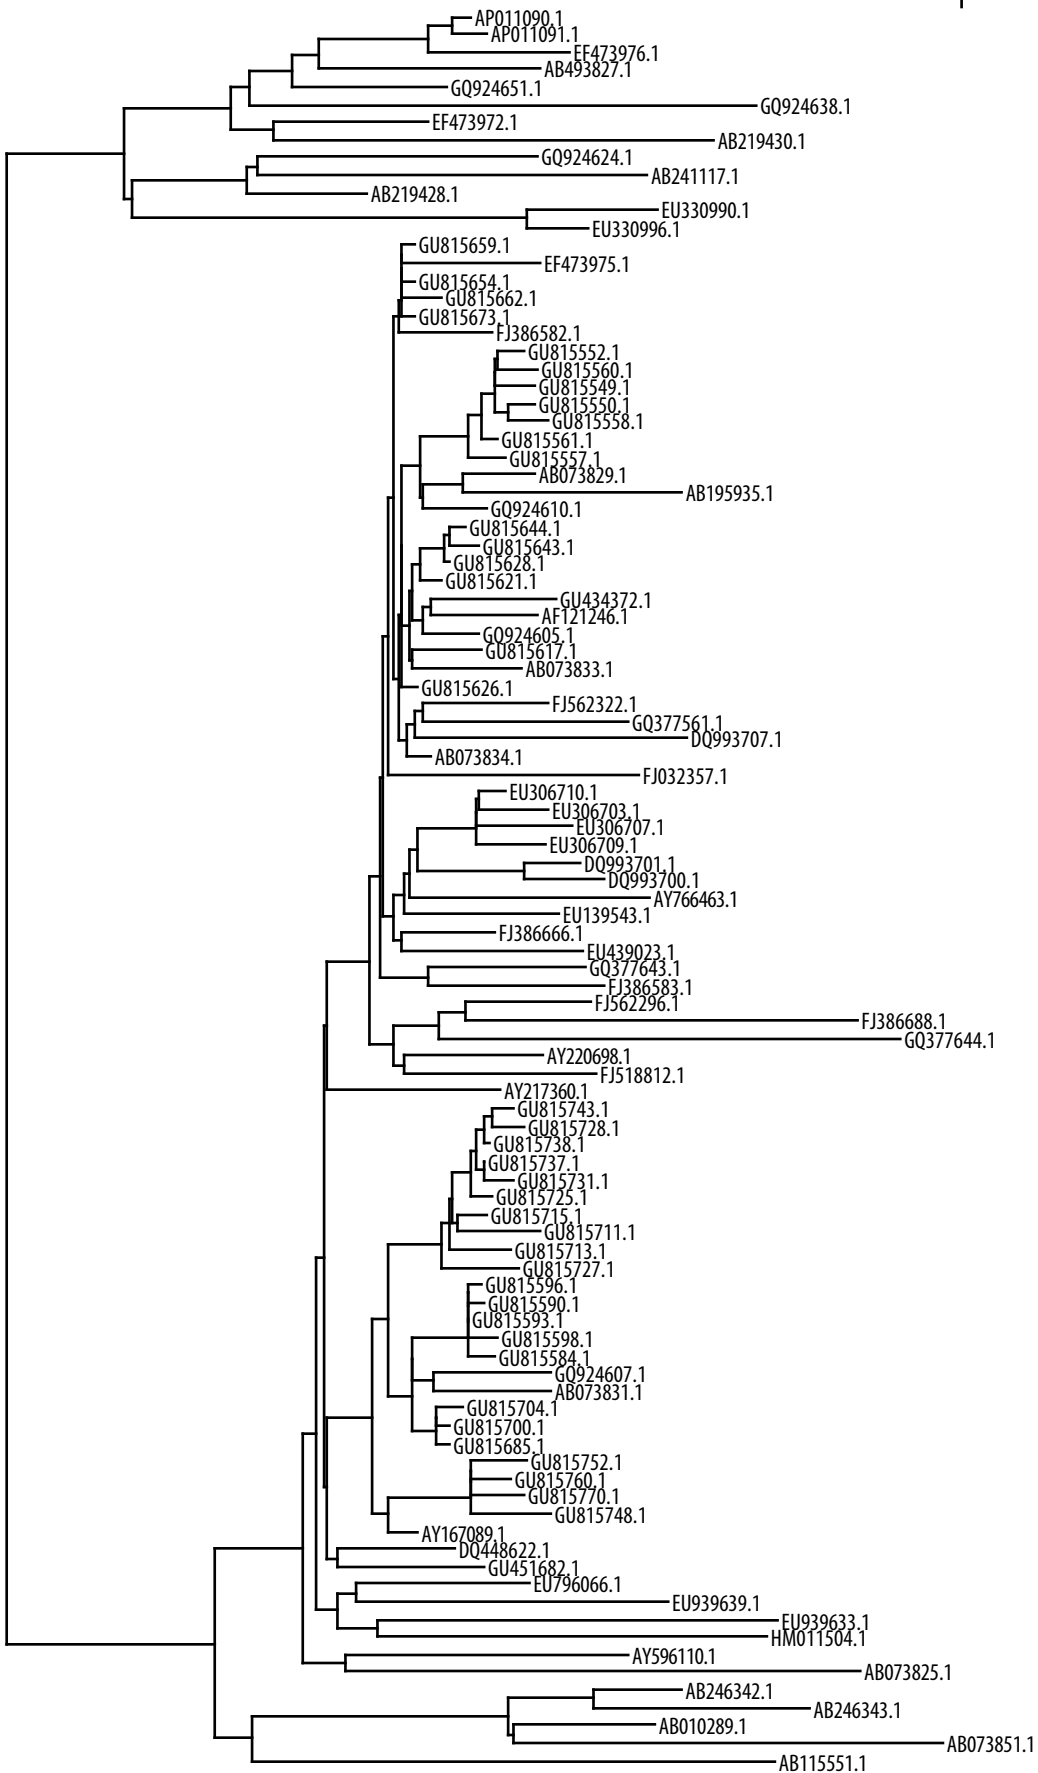

Supp. Fig 1ae: Phylogenetic tree of 100 HBV-B concatenated protein sequences used to generate the corresponding covariance network.

# Hepatitis B virus geotype C

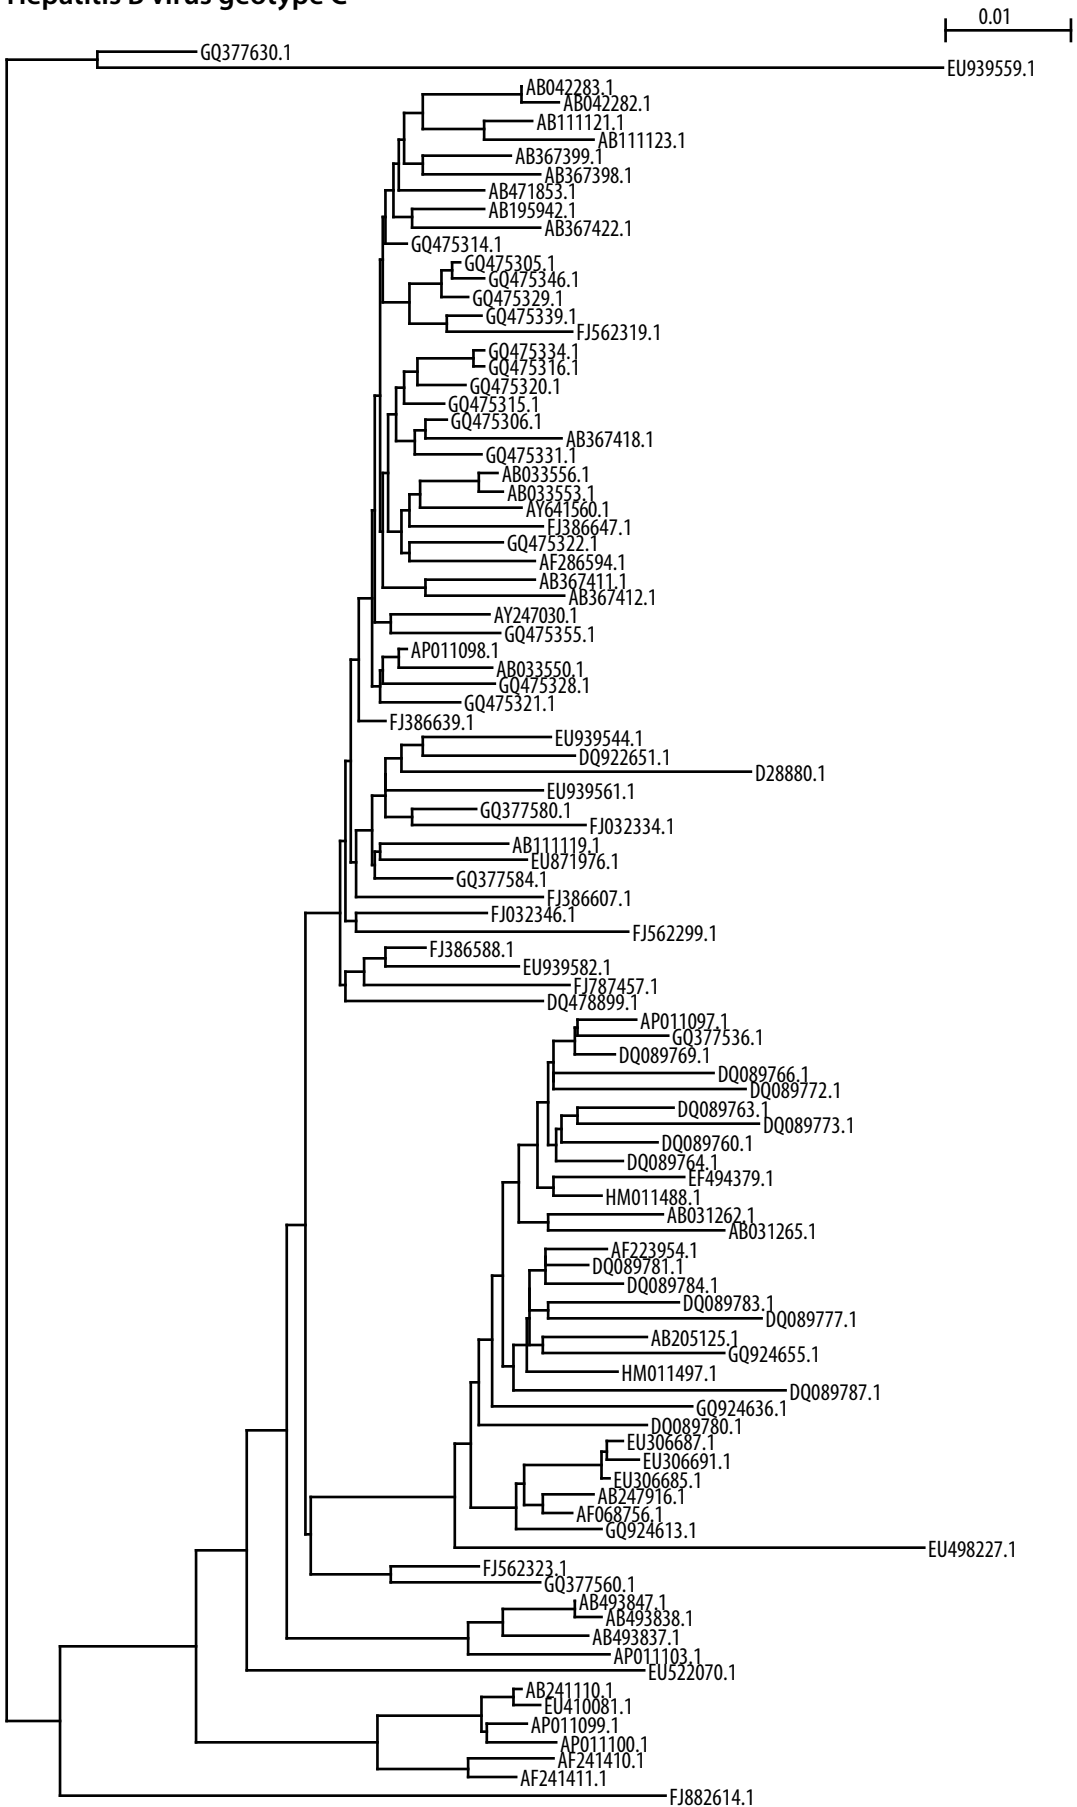

Supp. Fig 1af: Phylogenetic tree of 100 HBV-C concatenated protein sequences used to generate the corresponding covariance network.

# Hepatitis B virus genotype D

0.005

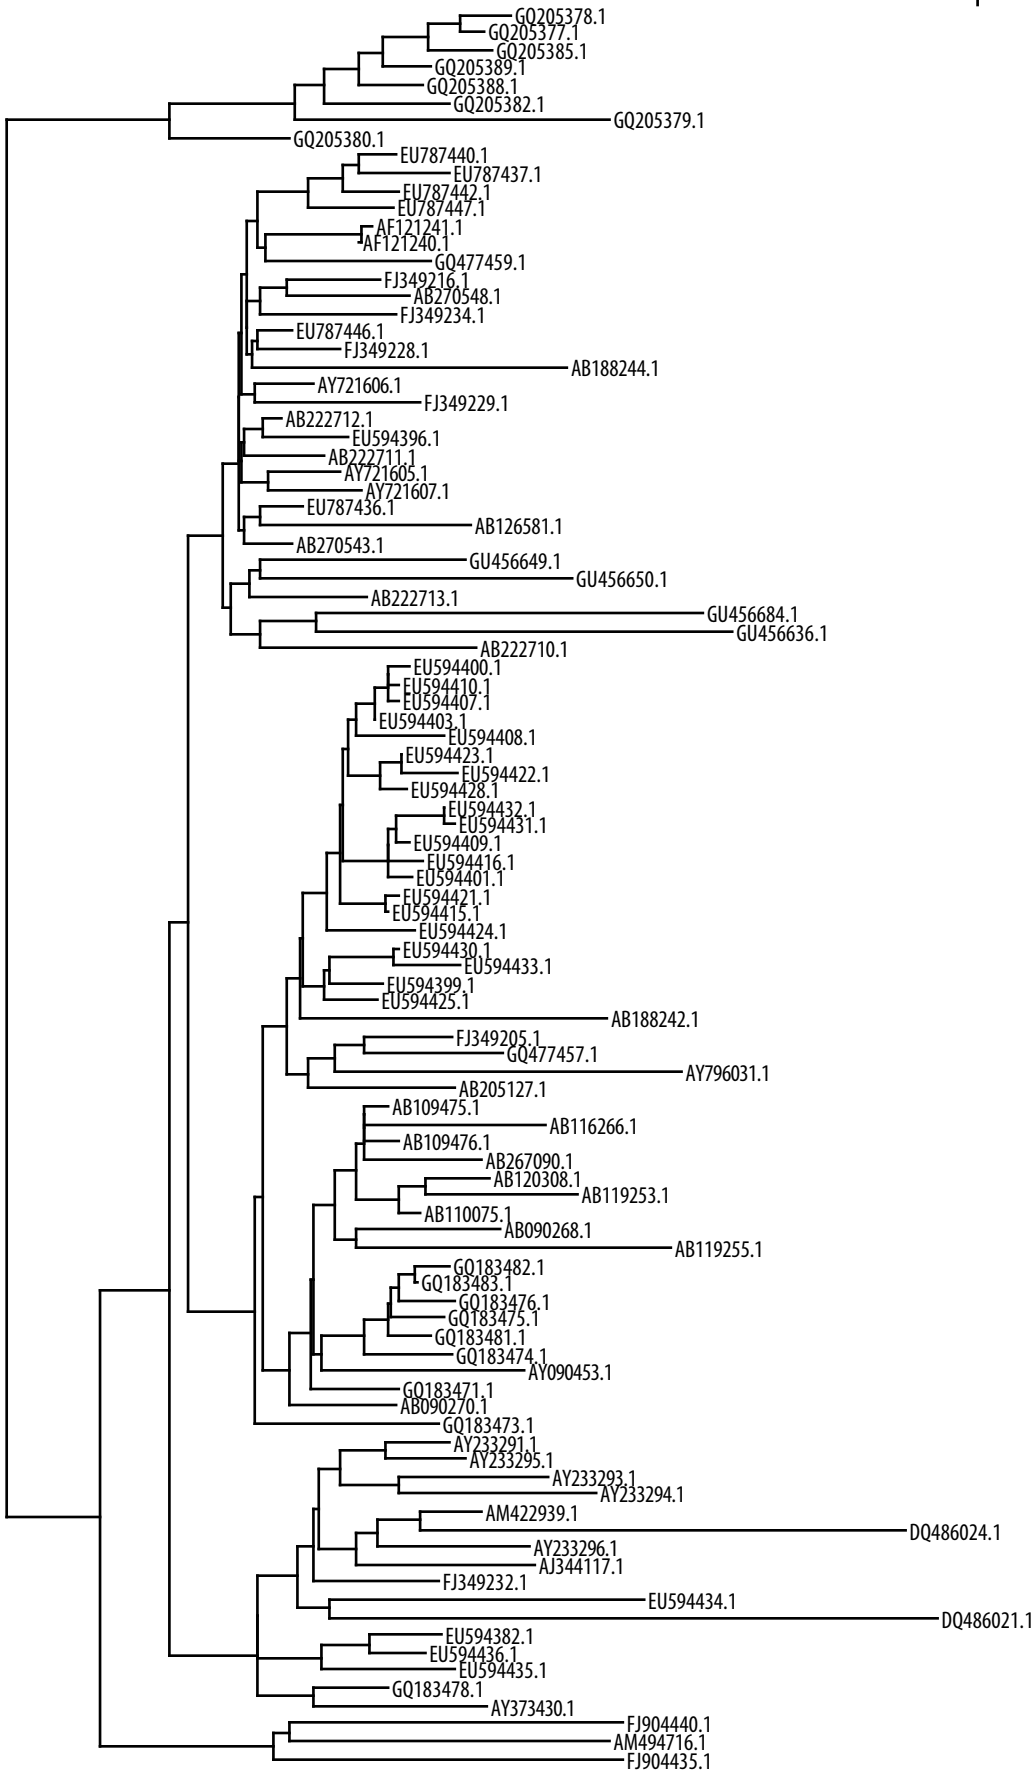

**Supp. Fig 1ag:** Phylogenetic tree of 100 HBV-D concatenated protein sequences used to generate the corresponding covariance network.
